# Supplementary material for: A glossy mutant in onion (Allium cepa L.) shows decreased expression of wax biosynthesis genes
Source: Front Plant Sci. 2023 Aug 23;14:1245308. doi: 10.3389/fpls.2023.1245308 (PMC10482397; doi:10.3389/fpls.2023.1245308)
Supplement: Supplementary file 2 [file Table_1.xlsx]

## Sheet: Sheet1
gene_id	Description	log2FoldChange	baseMean	lfcSE	stat	pvalue	padj	Length	e-Value	similarity_mean
g393827.t1	Mediator of RNA polymerase II transcription subunit 25	10.345	105.324	1.51723	6.81835	9.20902e-12	4.91483e-09	630	2.8729e-66	92.05
g239880.t1	18.1 kDa class I heat shock protein-like	9.58877	62.7233	1.5528	6.17515	6.60998e-10	2.33373e-07	480	9.25577e-72	88.6
g212976.t1	threonylcarbamoyladenosine tRNA methylthiotransferase	9.28471	50.4661	1.57345	5.90087	3.61594e-09	9.99785e-07	678	1.21932e-59	63.53
g10833.t1	cysteine synthase	9.22697	49.9424	1.58238	5.83106	5.50771e-09	1.48702e-06	210	1.19497e-38	91.98
g208293.t1	cysteine synthase	9.19101	48.3697	1.58018	5.81643	6.01178e-09	1.60424e-06	312	1.74717e-38	91.91
g40927.t1	pathogenesis-related protein 1	9.02231	571.619	0.726444	12.4198	2.04014e-35	1.17048e-31	495	2.80058e-100	80.89
g27234.t1	Aquaporin SIP1-2	8.95915	40.5686	1.60463	5.5833	2.35993e-08	5.64146e-06	462	1.73056e-25	70.59
g479318.t1	replication protein A 70 kDa DNA-binding subunit D-like	8.86171	37.8422	1.61751	5.4786	4.28714e-08	9.46015e-06	510	5.06547e-14	51.65
g337098.t1	cytochrome P450 89A2	8.42782	150.35	1.10171	7.64978	2.01324e-14	1.65007e-11	1548	0	78.89
g49518.t1	MICOS complex subunit MIC60 isoform X2	8.04151	21.3117	1.72127	4.67184	2.98508e-06	0.000366334	708	3.17693e-66	88.58
g218266.t1	amino acid permease 8-like	7.8931	51.676	1.62029	4.87141	1.10806e-06	0.000160943	1383	4.73018e-123	64.86
g16974.t1	ATP-dependent RNA helicase glh-1-like	7.68126	16.5094	1.8214	4.21724	2.47313e-05	0.00220839	2163	2.62488e-05	75
g327259.t1	putative transposase, Ptta/En/Spm, plant, transposase, Tnp1/En/Spm	7.58836	15.5897	1.81134	4.18935	2.7975e-05	0.00244106	624	1.81811e-51	80.52
g181184.t1	Transcriptional adapter ADA2b	7.50401	14.8534	1.86181	4.03048	5.56625e-05	0.00434489	426	2.01892e-41	59.31
g54677.t1	protein GPR107-like	7.26962	12.4489	1.89548	3.83524	0.000125442	0.00856778	975	5.62198e-22	76.4
g501427.t1	E3 ubiquitin-protein ligase PUB23-like	7.25275	12.5646	1.88976	3.83792	0.000124079	0.00855101	351	2.2491e-39	78.95
g389939.t1	PREDICTED: uncharacterized protein LOC105113251	7.25129	12.4896	1.9003	3.81586	0.000135707	0.0090797	390	1.65777e-07	61.47
g259553.t1	50S ribosomal protein L12, chloroplastic-like	7.23491	12.3903	1.90368	3.80049	0.00014441	0.00949589	369	1.16573e-11	70.48
g251807.t1	phenylalanine--tRNA ligase, chloroplastic/mitochondrial	7.21148	12.0044	2.2319	3.23109	0.0012332	0.0482947	738	6.8714e-100	91.91
g130209.t1	calcium-dependent protein kinase 10-like	7.15138	11.6938	1.91935	3.72595	0.000194585	0.0120364	363	2.02053e-07	68.87
g22296.t1	S-locus F-box-like protein 4	7.11215	11.1576	2.01308	3.53297	0.000410917	0.0214321	2082	3.89153e-33	50.69
g101110.t1	Ethylene-responsive transcription factor WRI1	7.10845	11.2408	1.9365	3.67078	0.000241813	0.0141928	474	5.04146e-17	68.02
g34358.t1	transcription repressor OFP13-like	7.08664	30.24	1.60869	4.40522	1.05678e-05	0.00110236	1119	2.00272e-30	61.56
g117849.t1	uncharacterized protein LOC109835936	7.05057	10.8701	1.9525	3.61104	0.000304966	0.0170284	390	5.35849e-10	49.61
g120427.t1	uncharacterized protein LOC110668792	7.03136	10.532	1.96528	3.57779	0.000346514	0.0185798	2178	3.61658e-105	66.56
g451156.t1	agamous-like MADS-box protein AGL62	7.01255	10.4639	1.96816	3.563	0.000366636	0.0194317	600	4.276e-35	63.37
g336595.t1	L-ascorbate oxidase-like	6.92201	9.75609	2.03945	3.39406	0.000688657	0.0322802	1719	0	82.89
g219088.t1	topless-related protein 1-like isoform X2	6.91283	9.75226	2.02702	3.41035	0.000648806	0.0310197	618	7.57302e-52	75.38
g262115.t1	tyrosine decarboxylase 1	6.82952	9.25205	2.08004	3.28336	0.00102579	0.0428014	528	1.08027e-48	91.89
g22543.t1	cytochrome P450 89A2-like	6.81765	9.19379	2.0669	3.29848	0.000972083	0.0413323	486	7.4169e-42	77.47
g181226.t1	auxin response factor 18	6.81504	9.08627	2.10354	3.23979	0.00119617	0.0473292	1557	8.10644e-107	57.73
g265107.t1	Plant transposase	6.7256	8.61203	2.08552	3.22491	0.00126013	0.0491815	480	1.91619e-07	57.94
g309136.t1	uncharacterized protein A4U43_C04F21810	6.68656	8.43739	2.07663	3.21991	0.0012823	0.0497926	405	1.11139e-11	57.68
g337096.t1	cytochrome P450 89A2-like	6.01949	207.788	0.594244	10.1297	4.08056e-24	1.33778e-20	1554	0	79.22
g337099.t1	cytochrome P450 89A2-like	5.86159	64.4938	0.834412	7.02482	2.14343e-12	1.26127e-09	615	1.86617e-78	67.55
g337101.t1	cytochrome P450 89A2-like	5.73417	131.105	0.597624	9.59494	8.39623e-22	1.92685e-18	507	4.81111e-89	89.27
g406168.t1	CBF-like transcription factor	5.38633	48.763	1.11303	4.83934	1.30274e-06	0.000182296	825	2.39046e-47	72.57
g530827.t1	ethylene-responsive transcription factor ERF109-like	5.34516	28.9096	1.30315	4.10172	4.10088e-05	0.00337616	729	3.46839e-29	72.79
g501464.t1	E3 ubiquitin-protein ligase PUB23-like	5.16407	163.313	0.53492	9.65391	4.73173e-22	1.20654e-18	1314	8.54151e-132	73.16
g173071.t1	cotton fiber protein	5.13084	25.0461	1.26719	4.04898	5.14409e-05	0.00407075	531	2.47156e-24	56.23
g496914.t1	pleiotropic drug resistance protein 1	5.10249	31.0712	1.01141	5.04495	4.53648e-07	7.38353e-05	603	1.77334e-96	80.07
g331700.t1	putative lipase YOR059C	5.09132	14.9553	1.48722	3.42337	0.000618503	0.0298822	405	8.57471e-40	65.24
g405524.t1	hypothetical protein FCM35_KLT01933	5.06988	70.7362	0.755375	6.71174	1.92314e-11	9.39027e-09	255	2.76004e-11	56.05
g273767.t1	G-type lectin S-receptor-like serine/threonine-protein kinase SD2-5	5.0102	22.1141	1.18023	4.2451	2.18494e-05	0.0019741	1314	1.89065e-144	65.38
g403974.t1	non-symbiotic hemoglobin	4.81474	67.6561	0.733037	6.5682	5.09257e-11	2.20508e-08	1005	5.49426e-55	79.36
g292606.t1	uncharacterized acetyltransferase At3g50280-like	4.80077	23.492	1.48002	3.24371	0.00117984	0.0469832	1341	4.69217e-118	59.73
g95975.t1	mannose-specific lectin	4.69111	112.861	0.53614	8.7498	2.13737e-18	2.58161e-15	525	2.57284e-65	76.59
g332952.t1	zinc finger protein ZAT10-like	4.65807	67.8699	0.935391	4.97981	6.36483e-07	0.000100046	696	7.88453e-39	52.96
g528531.t1	E3 ubiquitin-protein ligase PUB23-like	4.53053	16.8584	1.40138	3.23289	0.00122544	0.048155	1167	1.60532e-123	70.44
g390578.t1	17.8 kDa class I heat shock protein-like	4.52265	49.6846	1.04738	4.31806	1.57405e-05	0.00153715	360	7.56558e-54	87.67
g272156.t1	transcription factor bHLH18-like	4.46525	14.9249	1.3399	3.33252	0.000860636	0.0378367	1038	7.78195e-57	57.73
g441118.t1	nudix hydrolase 18, mitochondrial-like	4.41514	112.872	0.655833	6.73211	1.67225e-11	8.34271e-09	477	6.34148e-52	70.72
g202437.t1	nudix hydrolase 17, mitochondrial	4.33015	33.1206	1.01865	4.25087	2.12943e-05	0.00193922	270	2.58297e-08	78.62
g405522.t1	uncharacterized protein LOC110116687	4.29472	33.5219	1.04235	4.12023	3.78492e-05	0.00315855	258	1.19929e-11	61.69
g446692.t1	heavy metal-associated isoprenylated plant protein 47-like	4.24173	28.5491	1.16283	3.64775	0.000264544	0.0153308	519	1.39826e-08	67.93
g399775.t1	guanine nucleotide exchange factor SPIKE 1	4.12059	109.501	0.65071	6.33244	2.41309e-10	9.3861e-08	834	1.63796e-94	67.65
g202484.t1	transcription factor bHLH35-like	4.10848	60.9071	1.0017	4.10152	4.10453e-05	0.00337616	723	1.90127e-77	67.78
g523925.t1	acetyl-CoA carboxylase beta subunit	4.10664	19.2594	1.11485	3.68358	0.000229979	0.0136377	948	1.90876e-119	100
g413514.t1	serine/threonine-protein kinase PCRK1-like isoform X2	4.09153	26.9507	0.937268	4.36538	1.26902e-05	0.00130012	1149	7.59469e-143	71.89
g159776.t1	protein ALP1-like	4.06829	482.775	0.608978	6.68052	2.38099e-11	1.10547e-08	1530	0	80.89
g38280.t1	uncharacterized protein LOC121994187	3.97234	325.554	0.458001	8.67323	4.20041e-18	4.59025e-15	945	1.39726e-10	49.69
g440784.t1	galactinol synthase 1	3.97141	91.7785	0.649363	6.11585	9.60407e-10	3.01923e-07	1008	8.64673e-176	83.8
g159789.t1	protein ALP1-like	3.91305	851.135	0.630874	6.2026	5.55395e-10	2.02314e-07	1473	0	79.53
g34373.t1	ethylene-responsive transcription factor 1A-like	3.87521	120.224	0.669947	5.78436	7.2788e-09	1.92001e-06	507	5.23366e-25	78.51
g532374.t1	putative disease resistance protein RGA3	3.86402	82.3661	0.861763	4.48386	7.33062e-06	0.000804027	1008	3.44908e-19	44.32
g176598.t1	Peroxidase 5	3.85245	69.3902	0.864702	4.45523	8.38045e-06	0.000890384	1011	7.89298e-150	79.72
g296607.t1	Plant transposase	3.83731	39.6199	1.17672	3.26104	0.00111005	0.0451248	861	5.73916e-37	51.64
g399774.t1	guanine nucleotide exchange factor SPIKE 1	3.78607	16.9293	1.11502	3.39552	0.000684991	0.032279	258	4.7625e-28	89.41
g129005.t1	uncharacterized protein LOC105040513	3.77208	377.394	0.548563	6.8763	6.14271e-12	3.35641e-09	555	6.1985e-06	59.16
g270534.t1	probable xyloglucan endotransglucosylase/hydrolase protein 23	3.6896	304.274	0.33238	11.1006	1.2467e-28	5.72208e-25	834	3.63407e-128	76.48
g268657.t1	bZIP transcription factor 53	3.64355	104.468	0.492114	7.40387	1.32271e-13	9.4859e-11	1065	7.43443e-52	79.96
g90033.t1	nudix hydrolase 17, mitochondrial-like	3.62467	738.194	0.683335	5.30439	1.13053e-07	2.23659e-05	618	2.18789e-50	73.63
g422481.t1	oxysterol-binding protein-related protein 4C isoform X1	3.60748	54.9797	0.753896	4.78511	1.70891e-06	0.000229344	1164	7.05256e-171	78.58
g176587.t1	Peroxidase 5	3.56553	77.8901	0.987046	3.61232	0.000303472	0.0169863	1008	6.97126e-157	80.7
g516038.t1	calcium-binding protein PBP1-like	3.55956	90.1778	0.687125	5.18038	2.2144e-07	4.06546e-05	285	1.04251e-30	84.73
g151904.t1	protein transport protein SEC31 homolog B	3.54441	32.9456	0.813626	4.35632	1.3227e-05	0.00134313	1980	6.27316e-90	55.71
g439522.t1	organic cation/carnitine transporter 2-like	3.48225	1214.15	0.266847	13.0496	6.38524e-39	4.88449e-35	1527	1.30687e-139	70.09
g371954.t1	putative nucleotidyltransferase, Ribonuclease H	3.42406	41.1181	0.714575	4.79175	1.65331e-06	0.000223187	3261	5.60383e-150	52.26
g383419.t1	60S ribosomal protein L29-1	3.37497	103.017	0.4895	6.89474	5.39625e-12	3.02045e-09	612	4.71493e-94	81.98
g210403.t1	S-adenosyl-L-methionine-dependent methyltransferase protein	3.31932	229.158	0.379054	8.75685	2.00783e-18	2.55987e-15	1383	0	71.27
g339978.t1	ataxin-2 homolog	3.31729	41.4492	0.921786	3.59876	0.00031974	0.0175964	384	1.36231e-14	51.76
g25318.t1	inactive protein RESTRICTED TEV MOVEMENT 2-like	3.27178	79.7442	0.676438	4.83678	1.31959e-06	0.000183535	741	6.25261e-42	61.7
g241707.t1	17.8 kDa class I heat shock protein-like	3.25983	511.46	0.594764	5.48088	4.23208e-08	9.42931e-06	477	4.35033e-71	89.08
g325122.t1	putative linoleate 9S-lipoxygenase 5	3.25046	86.9374	0.985509	3.29826	0.000972876	0.0413323	645	8.95043e-94	83.29
g17696.t1	B-box zinc finger protein 32-like	3.16592	29.0183	0.932848	3.39383	0.000689236	0.0322802	2253	1.23503e-19	46.03
g152642.t1	---NA---	3.16448	29.8453	0.940159	3.3659	0.000762954	0.0346028	2049
g538861.t1	predicted protein	3.1197	105.905	0.850443	3.66833	0.000244143	0.0142566	1020	3.30132e-05	51.54
g513066.t1	probable receptor-like protein kinase At4g10390	3.11344	21.2024	0.959792	3.24387	0.00117917	0.0469832	966	2.44182e-93	62.11
g270512.t1	probable xyloglucan endotransglucosylase/hydrolase protein 23	3.10588	438.483	0.355899	8.72686	2.61837e-18	3.00445e-15	888	5.43722e-159	84.34
g88687.t1	hypothetical protein SDJN03_27921, partial	3.0689	836.227	0.34625	8.86324	7.77226e-19	1.11479e-15	342	6.50905e-06	81.67
g427471.t1	receptor-like serine/threonine-protein kinase ALE2 isoform X1	3.06303	39.513	0.700118	4.37501	1.21424e-05	0.00124958	408	7.26771e-33	73.28
g202431.t1	nudix hydrolase 17, mitochondrial-like	3.05361	218.206	0.49849	6.12572	9.0274e-10	2.87736e-07	294	7.29542e-25	74.41
g270515.t1	probable xyloglucan endotransglucosylase/hydrolase protein 23	2.96762	697.16	0.294161	10.0884	6.21584e-24	1.78309e-20	1005	1.46875e-158	82.2
g244522.t1	calcium-binding protein PBP1-like	2.95241	170.707	0.481467	6.1321	8.67271e-10	2.84329e-07	516	2.97786e-48	84.11
g494630.t1	nudix hydrolase 17, mitochondrial	2.9431	42.6196	0.904632	3.25337	0.00114045	0.0459162	423	2.52104e-18	75.92
g119772.t1	probable glucomannan 4-beta-mannosyltransferase 9	2.92743	240.109	0.455935	6.42071	1.35636e-10	5.36675e-08	939	9.75892e-176	81.44
g202428.t1	nudix hydrolase 17, mitochondrial	2.92034	59.0749	0.748589	3.90113	9.57466e-05	0.00680275	516	2.07336e-41	69.38
g528064.t1	non-specific lipid-transfer protein 2-like	2.88289	368.992	0.669432	4.30647	1.65881e-05	0.00158617	390	2.79012e-35	72.44
g368670.t1	protein EXORDIUM-like	2.87478	646.109	0.337378	8.52095	1.58252e-17	1.65078e-14	1317	7.59981e-162	83.17
g283215.t1	protein PSK SIMULATOR 1-like	2.84461	131.213	0.763188	3.72727	0.000193564	0.0120364	1566	2.12344e-127	63.57
g161257.t1	protein GLUTAMINE DUMPER 3	2.84119	26.1637	0.857831	3.31206	0.000926124	0.0398755	891	1.23068e-12	64.67
g539288.t1	heavy metal-associated isoprenylated plant protein 35-like	2.83955	61.5043	0.567161	5.00661	5.53976e-07	8.76772e-05	804	2.91325e-27	78.13
g517913.t1	la-related protein 1B-like	2.83724	42.5398	0.772485	3.67288	0.000239834	0.0141127	462	2.62733e-30	70.65
g384169.t1	amino acid transporter AVT6C	2.83448	35.7929	0.869658	3.2593	0.00111686	0.0451248	912	1.78431e-97	75.45
g270516.t1	probable xyloglucan endotransglucosylase/hydrolase protein 23	2.81393	75.1544	0.715344	3.93368	8.36559e-05	0.00607538	501	1.00298e-73	80.27
g119773.t1	glucomannan 4-beta-mannosyltransferase 1-like	2.80569	296.174	0.493394	5.68651	1.29664e-08	3.19964e-06	663	1.42756e-90	81.65
g270511.t1	xyloglucan endotransglucosylase/hydrolase protein 22-like	2.78273	120.406	0.521149	5.3396	9.3153e-08	1.88869e-05	528	2.00291e-81	81.09
g419980.t1	PsbA	2.69541	461.636	0.528613	5.09902	3.4142e-07	5.75114e-05	1443	2.42376e-29	98.53
g270510.t1	probable xyloglucan endotransglucosylase/hydrolase protein 23	2.68395	163.85	0.528848	5.07508	3.87326e-07	6.44113e-05	546	3.21055e-73	78.63
g20979.t1	protein HEADING DATE 3A-like	2.67597	56.8873	0.616363	4.34155	1.41479e-05	0.00141782	537	5.11824e-119	89.75
g331386.t1	PsbA	2.6698	147.365	0.583287	4.57717	4.71309e-06	0.000540804	384	3.82912e-21	100
g390584.t1	17.8 kDa class I heat shock protein-like	2.65351	1608.18	0.625387	4.24299	2.20557e-05	0.00198492	864	1.4426e-69	89.34
g361293.t1	RNA polymerase archaeal subunit P/eukaryotic subunit RPABC4 protein	2.65105	750.773	0.471472	5.62293	1.87742e-08	4.5835e-06	1323	7.11186e-82	64.3
g409911.t1	ring-H2 zinc finger protein	2.64292	456.37	0.795289	3.32322	0.000889836	0.0388654	945	1.67212e-39	67.31
g486860.t1	non-specific lipid-transfer protein	2.64031	388.467	0.644479	4.09681	4.18884e-05	0.00343321	519	1.70525e-09	78.06
g494613.t1	nudix hydrolase 18, mitochondrial	2.61398	724.909	0.468482	5.57969	2.40954e-08	5.66315e-06	507	7.87413e-50	74.49
g301667.t1	aldehyde dehydrogenase family 3 member F1-like	2.60699	314.94	0.619001	4.21161	2.53559e-05	0.0022554	1425	0	81.69
g493618.t1	uncharacterized membrane protein At3g27390-like isoform X2	2.60491	405.769	0.336086	7.75071	9.13776e-15	7.76675e-12	777	4.24693e-72	73.52
g194014.t1	17.8 kDa class I heat shock protein-like	2.55505	107.034	0.766454	3.3336	0.00085729	0.0377687	537	3.11845e-53	87.58
g135301.t1	protein ENHANCED DISEASE RESISTANCE 4-like	2.55045	64.381	0.647543	3.93866	8.19386e-05	0.00596955	855	1.03054e-19	72.73
g205837.t1	suppressor of disruption of TFIIS-like	2.54414	83.8909	0.528831	4.81088	1.50265e-06	0.00020405	804	2.07594e-91	71.41
g145764.t1	amino acid transporter AVT6C-like	2.54042	61.9806	0.71488	3.55363	0.000379948	0.0199987	720	1.7275e-116	83.97
g210293.t1	hypothetical protein PVAP13_1NG538219	2.53058	242.25	0.485268	5.21482	1.83996e-07	3.40525e-05	1245	2.33388e-09	72.75
g270532.t1	xyloglucan endotransglucosylase/hydrolase protein 22-like	2.53041	90.4749	0.613428	4.12503	3.70692e-05	0.00311612	414	5.1078e-67	77.9
g181728.t1	EGF domain-specific O-linked N-acetylglucosamine transferase-like	2.52865	577.923	0.415299	6.08875	1.13794e-09	3.48195e-07	1419	0	78.71
g65259.t1	Mediator of RNA polymerase II transcription subunit 18	2.5061	140.92	0.642529	3.90037	9.60448e-05	0.00680288	435	1.54381e-40	66.19
g263648.t1	protein ENHANCED DISEASE RESISTANCE 4-like	2.49372	48.312	0.68489	3.64105	0.000271528	0.0155301	975	8.46317e-50	54.94
g454709.t1	amino acid permease 8-like	2.49304	108.387	0.495376	5.03261	4.83836e-07	7.8194e-05	1587	0	80.2
g449553.t1	AP2/ERF and B3 domain-containing transcription factor RAV1-like	2.48772	176.919	0.511511	4.86347	1.15348e-06	0.000164523	1260	1.4087e-118	69.83
g159573.t1	probable calcium-binding protein CML10	2.4607	273.605	0.324608	7.58053	3.44142e-14	2.72335e-11	672	1.39251e-60	79.56
g421663.t1	putative F-box protein At1g19160	2.45504	45.9796	0.638814	3.84313	0.000121476	0.00842224	858	2.83121e-16	43.66
g187568.t1	photosystem II protein D1	2.45468	709.155	0.455064	5.39414	6.88525e-08	1.44963e-05	456	1.62422e-41	93.23
g223589.t1	probable CCR4-associated factor 1 homolog 11	2.45301	363.313	0.577818	4.24531	2.18295e-05	0.0019741	912	1.40532e-127	76.64
g367787.t1	photosystem II q(b) protein	2.44317	604.314	0.437919	5.57905	2.41835e-08	5.66315e-06	1554	5.61567e-34	85.59
g389700.t1	pseudo histidine-containing phosphotransfer protein 5-like	2.44021	163.613	0.53016	4.60277	4.16908e-06	0.000480785	411	6.65997e-69	85.01
g493184.t1	linoleate 9S-lipoxygenase 6-like	2.42697	253.104	0.716968	3.38505	0.000711641	0.0328601	2802	0	83.26
g94388.t1	hydrophobic protein rci2b	2.41701	104.005	0.728632	3.31719	0.000909262	0.0392969	318	2.79483e-18	98.06
g457910.t1	photosystem II reaction center protein	2.40196	253.861	0.433994	5.53456	3.12015e-08	7.02003e-06	351	3.76782e-37	83.62
g44669.t1	heavy metal-associated isoprenylated plant protein 3-like	2.39175	151.004	0.408042	5.86153	4.58623e-09	1.25297e-06	948	4.83921e-82	75.98
g311140.t1	mannan endo-1,4-beta-mannosidase 2-like	2.3913	246.679	0.629517	3.79863	0.000145495	0.00953992	1335	0	81.64
g319436.t1	U-box domain-containing protein 33-like	2.39116	48.3882	0.728778	3.28106	0.00103417	0.042995	2418	0	60.05
g259450.t1	photosystem II protein D1	2.38408	1068.09	0.41748	5.71065	1.12543e-08	2.86973e-06	360	7.88097e-67	95.53
g350267.t1	ribosomal protein L2	2.38163	107.569	0.653361	3.64521	0.000267177	0.0154057	870	9.94993e-15	86.31
g453076.t1	ethylene-responsive transcription factor ERF014	2.36035	176.225	0.362349	6.51403	7.31612e-11	3.05268e-08	612	1.37882e-33	83.55
g459058.t1	photosystem II CP43 chlorophyll apoprotein	2.35716	493.059	0.431693	5.46025	4.75456e-08	1.03917e-05	1182	9.67545e-28	74.11
g353282.t1	---NA---	2.35503	272.832	0.349587	6.7366	1.62134e-11	8.26849e-09	615
g66629.t1	cbf-like transcription factor	2.35165	88.4321	0.695375	3.38184	0.000720011	0.0329666	1299	1.61062e-58	68.36
g194479.t1	PSII 43 kDa protein	2.34888	819.565	0.482437	4.86878	1.1229e-06	0.000162072	795	1.10997e-53	97.13
g317126.t1	photosystem II protein D1	2.33769	213.704	0.473991	4.93192	8.14234e-07	0.00012213	1293	1.78992e-39	97.07
g175062.t1	22.0 kDa class IV heat shock protein-like	2.32039	2131.46	0.45516	5.09796	3.43329e-07	5.75114e-05	528	8.61936e-77	84.33
g194021.t1	17.8 kDa class I heat shock protein-like	2.31505	651.419	0.366457	6.31739	2.66019e-10	1.01748e-07	477	4.20217e-70	88.45
g191105.t1	NEP1-interacting protein 1	2.30384	105.466	0.570643	4.03727	5.40775e-05	0.00425009	822	1.28458e-95	81.75
g52235.t1	heavy metal-associated isoprenylated plant protein 30-like	2.30063	259.699	0.462711	4.97207	6.62412e-07	0.000103413	804	1.43972e-100	78.75
g270533.t1	probable xyloglucan endotransglucosylase/hydrolase protein 23	2.29737	146.769	0.609896	3.76683	0.000165335	0.0106282	468	2.62685e-77	91
g518568.t1	BTB/POZ domain-containing protein At5g41330	2.29527	161.23	0.618676	3.70996	0.000207288	0.0125516	1407	7.66985e-164	69.31
g95966.t1	mannose-specific lectin	2.28627	12875.3	0.499649	4.57576	4.74498e-06	0.000541754	726	3.27194e-119	91.15
g311468.t1	Photosystem II protein D1	2.26779	143.068	0.56923	3.98396	6.77765e-05	0.00510618	1734	3.01929e-22	87.35
g271954.t1	hypothetical protein KY289_012276	2.26642	633.648	0.320749	7.066	1.59464e-12	9.89067e-10	693	4.235e-101	84.39
g213201.t1	probable xyloglucan endotransglucosylase/hydrolase protein 23	2.25922	168.082	0.422782	5.34371	9.10654e-08	1.86595e-05	894	4.00021e-158	83.76
g242857.t1	NAC domain-containing protein 68-like	2.23286	145.574	0.57107	3.90996	9.23118e-05	0.00659958	741	1.31171e-101	74.29
g531913.t1	ATP synthase beta subunit	2.22637	186.283	0.59588	3.73628	0.000186766	0.0116787	666	7.03857e-50	97.38
g48722.t1	17.8 kDa class I heat shock protein-like	2.2251	1390.06	0.588246	3.7826	0.0001552	0.0100613	477	4.35033e-71	89.08
g19387.t1	mannose-specific lectin	2.22264	19416.6	0.234885	9.46266	3.00195e-21	6.26288e-18	582	9.009e-116	91.54
g117670.t1	ethylene-responsive transcription factor 4-like	2.21328	416.018	0.628581	3.52107	0.000429809	0.0222155	561	3.54411e-25	82.79
g75649.t1	probable LRR receptor-like serine/threonine-protein kinase At1g56130 isoform X1	2.19892	384.277	0.658992	3.33679	0.000847512	0.0375474	3129	0	81.95
g295809.t1	NAC domain-containing protein 68	2.19078	1119.14	0.612315	3.57787	0.000346404	0.0185798	1341	2.3292e-157	74.77
g502407.t1	non-specific lipid-transfer protein 2-like	2.19059	175.206	0.669558	3.2717	0.00106905	0.0441251	345	8.26433e-13	70.33
g201226.t1	WAT1-related protein At4g08300-like	2.189	140.706	0.424997	5.15062	2.59627e-07	4.61874e-05	1101	0	82.84
g499495.t1	HAD domain-containing protein	2.17115	799.444	0.58487	3.71219	0.000205475	0.0125411	804	2.07478e-79	70.55
g106317.t1	glutamine synthetase cytosolic isozyme	2.14492	73.8329	0.508245	4.22024	2.4404e-05	0.00218768	957	0	90.63
g157092.t1	WRKY transcription factor WRKY24	2.14473	605.689	0.54806	3.91331	9.10378e-05	0.0065493	1683	1.87647e-170	65.85
g430692.t1	small heat shock protein, chloroplastic	2.13586	2463.47	0.513582	4.15874	3.20001e-05	0.00277121	690	3.60876e-74	73.54
g53793.t1	LON protease2	2.13572	57.0985	0.569492	3.75021	0.000176684	0.0112009	1272	3.7492e-49	74.9
g438011.t1	auxin-responsive protein IAA1-like	2.12365	249.421	0.368895	5.75678	8.57328e-09	2.21065e-06	246	2.49635e-22	85.74
g117618.t1	protein PHLOEM PROTEIN 2-LIKE A1-like	2.06571	3770.54	0.589604	3.50354	0.000459111	0.023485	558	2.34113e-27	54.25
g83899.t1	DNase I-like protein	2.05948	54.9127	0.573036	3.59398	0.00032566	0.0178794	1392	2.17915e-93	66.39
g101987.t1	mitogen-activated protein kinase kinase kinase 18	2.05892	117.52	0.63084	3.26378	0.00109936	0.0448174	1425	2.801e-110	68.16
g193304.t1	mannose-specific lectin	2.0568	1601.33	0.504762	4.07479	4.60564e-05	0.00368275	549	9.84313e-110	90
g469702.t1	unnamed protein product	2.03698	95.6792	0.56003	3.63726	0.000275549	0.0156704	4497	0	66.84
g445835.t1	mitochondrial uncoupling protein 5-like	2.03059	73.3173	0.565267	3.59226	0.000327822	0.0179551	954	5.85533e-154	83.4
g282835.t1	Photosynthetic reaction centre, L/M	2.02483	331.606	0.437624	4.62688	3.71218e-06	0.000437266	261	1.07551e-22	98.34
g14087.t1	probable BOI-related E3 ubiquitin-protein ligase 2	1.9975	78.376	0.612954	3.2588	0.00111883	0.0451248	858	2.35701e-37	56.98
g264288.t1	myb-related protein Myb4-like	1.99501	100.556	0.615198	3.24287	0.00118333	0.0469832	942	2.88387e-86	68.01
g54028.t1	syntaxin-121-like	1.97664	168.519	0.558332	3.54025	0.000399747	0.020897	969	3.45375e-91	73.6
g170842.t1	non-specific lipid-transfer protein 2-like	1.96929	317.225	0.598247	3.29176	0.00099562	0.0418471	357	1.60775e-39	72.85
g183249.t1	Zinc finger protein ZAT10	1.96288	118.655	0.47532	4.1296	3.63391e-05	0.00308869	804	5.32987e-29	54.84
g537963.t1	CCG-binding protein 1	1.95988	307.733	0.343324	5.70853	1.13954e-08	2.87377e-06	465	1.08152e-60	80.62
g240549.t1	AAA-ATPase At2g46620	1.95524	102.365	0.487117	4.0139	5.97225e-05	0.00461472	1386	1.26891e-122	65.73
g259452.t1	hypothetical chloroplast RF68	1.94167	65.8038	0.518559	3.74435	0.000180864	0.0114029	852	9.20266e-27	81.26
g505856.t1	helicase SEN1-like	1.93694	115.144	0.566842	3.41707	0.000632983	0.0303898	3690	0	65.94
g249423.t1	myb-related protein 306-like	1.92899	79.3772	0.505696	3.81453	0.000136441	0.00910227	849	3.52791e-98	77.04
g77075.t1	protein STRUBBELIG-RECEPTOR FAMILY 3 isoform X1	1.92537	314.977	0.363104	5.30251	1.1422e-07	2.24038e-05	1191	6.24819e-89	59.66
g300789.t1	myb-related protein 308	1.90612	128.509	0.496352	3.84026	0.000122905	0.00849566	711	8.14199e-158	74.6
g320611.t1	transcription factor MYB44-like	1.88458	458.083	0.555956	3.3898	0.000699435	0.0324926	1248	1.01557e-75	57.25
g478935.t1	---NA---	1.87598	219.147	0.337837	5.55292	2.80929e-08	6.51216e-06	561
g205157.t1	Arc-type ribbon-helix-helix-containing protein	1.87558	98.7104	0.567739	3.3036	0.000954509	0.040944	918	1.40813e-66	59.16
g170718.t1	luminal-binding protein	1.87243	222.223	0.395286	4.73689	2.17024e-06	0.000281384	2007	0	95.66
g175758.t1	probable serine/threonine-protein kinase PBL7	1.86232	68.0962	0.51703	3.60195	0.000315844	0.0174906	912	5.53424e-104	68.24
g400305.t1	nuA4 complex subunit EAF3-like protein	1.84737	363.379	0.333249	5.54352	2.96448e-08	6.80317e-06	1155	1.23974e-15	85.75
g243144.t1	ethylene-responsive transcription factor RAP2-13-like	1.84089	253.113	0.426517	4.31611	1.58801e-05	0.0015442	981	9.33056e-48	67.63
g175094.t1	hypothetical protein BVC80_4285g1	1.82615	5595.42	0.408991	4.46502	8.00613e-06	0.000862594	489	1.68345e-83	84.92
g421694.t1	peroxidase 47	1.81919	890.298	0.295638	6.15343	7.5826e-10	2.59721e-07	969	0	85.87
g125297.t1	cysteine proteinase inhibitor 12-like	1.80886	667.164	0.257319	7.02965	2.07055e-12	1.25045e-09	432	1.949e-49	82.77
g83900.t1	DNase I-like protein	1.80597	258.187	0.356185	5.07031	3.97165e-07	6.55722e-05	1518	2.79597e-89	66.99
g406836.t1	glycerophosphodiester phosphodiesterase GDPD1, chloroplastic-like	1.7834	196.736	0.513385	3.47381	0.000513134	0.0257116	1119	0	81.97
g439382.t1	ATP synthase beta subunit	1.76807	559.297	0.477798	3.70046	0.000215209	0.0128951	1158	1.868e-37	71.65
g369139.t1	GEM-like protein 7	1.76568	80.4737	0.51616	3.42081	0.000624346	0.030038	603	2.01238e-52	56.69
g255236.t1	Signal transducer and transcription activator isoform 1	1.74064	171.01	0.361028	4.82134	1.42595e-06	0.000195458	441	1.71928e-61	80.79
g19594.t1	zinc finger A20 and AN1 domain-containing stress-associated protein 5	1.73555	500.535	0.52041	3.33498	0.000853068	0.0377207	1005	8.28891e-25	82.52
g478161.t1	serine carboxypeptidase-like 27	1.70832	149.979	0.448657	3.80762	0.000140309	0.00930622	1356	0	88.59
g36071.t1	potassium channel KAT3-like	1.70495	95.3125	0.478603	3.56234	0.000367564	0.019436	2121	0	75.06
g213508.t1	probable inactive poly [ADP-ribose] polymerase SRO3	1.70372	91.0054	0.449494	3.7903	0.000150464	0.00980963	1203	2.9335e-123	61.1
g408751.t1	ORF91 protein	1.69824	170.316	0.500986	3.3898	0.000699437	0.0324926	777	1.22539e-140	81.82
g365307.t1	GDSL esterase/lipase CPRD49	1.6974	64.7395	0.523284	3.24375	0.00117969	0.0469832	555	4.49151e-82	77.19
g529456.t1	protein STRUBBELIG-RECEPTOR FAMILY 3-like isoform X1	1.69263	119.13	0.467243	3.62259	0.000291669	0.0163656	1641	2.16474e-120	67.6
g422983.t1	cytochrome P450 94A1-like	1.68505	399.777	0.498559	3.37983	0.000725304	0.0330915	1638	0	71.71
g331198.t1	ribonuclease II, chloroplastic/mitochondrial isoform X1	1.67602	630.158	0.279148	6.00407	1.92435e-09	5.73532e-07	2667	0	82.98
g209091.t1	glycosyltransferase family 92 protein Os08g0121900-like	1.63811	104.664	0.451497	3.62818	0.000285423	0.0160629	1662	0	69.84
g535085.t1	probable galacturonosyltransferase-like 1	1.63579	224.567	0.343396	4.76356	1.90209e-06	0.000253785	1197	4.17885e-175	84.18
g388068.t1	predicted protein	1.62853	238.114	0.451917	3.60361	0.000313827	0.0174383	579	4.29399e-19	70.71
g45031.t1	LON protease2	1.59079	88.6579	0.4511	3.52647	0.000421137	0.0218164	864	2.2786e-60	78.43
g242954.t1	protein PTST homolog 2, chloroplastic-like	1.56463	98.0926	0.459925	3.40192	0.000669154	0.0316629	1626	6.98563e-64	51.9
g430639.t1	thaumatin-like protein 1	1.555	236.143	0.328744	4.73013	2.24373e-06	0.000287661	1014	7.98647e-132	80.91
g256987.t1	L-ascorbate oxidase homolog	1.55119	377.606	0.446896	3.47104	0.000518452	0.0259214	1689	0	86.31
g350909.t1	ribulose-1,5-bisphosphate carboxylase/oxygenase large subunit	1.54843	547.944	0.403609	3.83645	0.000124824	0.00855753	1044	4.33327e-52	95.6
g470618.t1	uncharacterized protein LOC109823790	1.54584	267.98	0.367724	4.20381	2.62457e-05	0.0023097	5085	0	73.22
g369123.t1	putative GEM-like protein 8	1.5417	190.545	0.374118	4.12088	3.77433e-05	0.00315855	708	5.4994e-57	61.83
g182971.t1	enoyl-CoA delta isomerase 2, peroxisomal-like	1.51997	204.124	0.397061	3.82804	0.000129168	0.00874415	654	1.35954e-51	63.15
g270072.t1	probable inositol oxygenase	1.5112	129.821	0.404082	3.73983	0.000184145	0.0115463	1140	9.07922e-152	80.76
g290809.t1	kinesin-like protein KIN-14J isoform X1	1.51076	165.572	0.401878	3.75924	0.000170431	0.0108344	2454	0	71.41
g410627.t1	early nodulin-like protein 1	1.49975	268.075	0.311108	4.82066	1.43087e-06	0.000195458	1530	1.47843e-53	78.27
g157446.t1	nuclear poly(A) polymerase 4-like	1.4817	151.942	0.39022	3.79709	0.000146406	0.00957227	2424	0	83.27
g315778.t1	UPF0496 protein 4-like isoform X1	1.47412	278.925	0.317021	4.64992	3.32067e-06	0.000401084	1161	4.68155e-134	79.55
g529452.t1	protein STRUBBELIG-RECEPTOR FAMILY 3-like isoform X1	1.47165	262.069	0.344621	4.27035	1.95166e-05	0.00181331	2091	0	61.51
g446525.t1	prostaglandin reductase-3	1.46307	1909.44	0.326093	4.48668	7.23421e-06	0.000798163	972	3.49521e-127	79.5
g56834.t1	DNA-directed RNA polymerase III subunit RPC4 isoform X3	1.45782	172.692	0.383313	3.80321	0.000142836	0.00941936	1182	1.48985e-75	59.18
g269719.t1	exocyst complex component EXO70H1	1.4546	280.746	0.332082	4.38023	1.18553e-05	0.00122553	1707	8.86049e-151	60.03
g262935.t1	hypothetical protein KY290_010699	1.45394	874.018	0.42739	3.40191	0.000669158	0.0316629	2679	1.40714e-171	65.39
g523434.t1	hypothetical protein MARPO_0152s0025	1.44097	538.525	0.434154	3.31903	0.000903313	0.0391134	669	7.87005e-12	91.83
g159163.t1	uncharacterized protein LOC110030454 isoform X2	1.42539	149.621	0.429305	3.32022	0.000899465	0.0390204	270	4.11476e-43	86.47
g47611.t1	hypothetical protein BVC80_4285g1	1.42429	1576.41	0.342444	4.1592	3.19369e-05	0.00277121	1233	1.86126e-113	76.44
g33672.t1	3-oxoacyl-[acyl-carrier-protein] synthase	1.41763	266.054	0.431877	3.28247	0.00102901	0.0428582	534	6.70411e-45	65.44
g475918.t1	ABC transporter G family member 14	1.40593	227.359	0.326092	4.31144	1.62195e-05	0.00155741	1941	0	83.37
g78020.t1	microtubule-associated protein 70-5-like	1.4035	314.135	0.295614	4.74776	2.05686e-06	0.000270933	1737	2.62007e-169	69.35
g412360.t1	ruBisCO large subunit-binding protein subunit alpha isoform X1	1.40091	201.038	0.352678	3.97222	7.12059e-05	0.00532282	1758	0	87.19
g399093.t1	CCG-binding protein 1	1.38898	2501.27	0.23429	5.92847	3.05776e-09	8.66327e-07	921	1.41851e-89	77.4
g229153.t1	ribulose-bisphosphate carboxylase large chain	1.38015	18312.9	0.392226	3.51877	0.000433559	0.022359	1923	9.31515e-172	75.15
g489976.t1	protein cfxQ homolog isoform X1	1.37124	407.466	0.343537	3.99154	6.56464e-05	0.00500505	1449	0	86.08
g53069.t1	mitochondrial uncoupling protein 5-like	1.36441	1227.64	0.275675	4.94933	7.44698e-07	0.000112435	930	1.17454e-157	84.01
g200244.t1	NAD(P)H-quinone oxidoreductase subunit H, chloroplastic	1.35952	1289.74	0.388488	3.49952	0.000466091	0.0237696	2010	5.28788e-91	63.15
g423298.t1	coiled-coil domain-containing protein 130-like	1.33712	303.835	0.368323	3.6303	0.000283091	0.0160016	1008	1.27055e-166	87.85
g399104.t1	hypothetical protein H6P81_021537	1.32955	1021.34	0.39273	3.38541	0.000710719	0.0328601	618	1.46649e-37	56.7
g55547.t1	hypothetical protein KY290_010699	1.32517	3810.3	0.405556	3.26753	0.00108489	0.0445597	825	3.92091e-112	82.07
g450684.t1	heat stress transcription factor A-2c-like	1.32282	184.455	0.402828	3.28383	0.00102406	0.0428014	951	4.30677e-120	73.34
g466409.t1	unconventional SNARE in the endoplasmic reticulum protein 1	1.31059	194.081	0.354091	3.70127	0.000214522	0.0128876	981	2.75544e-102	77.39
g250978.t1	universal stress protein A-like protein	1.30408	190.611	0.364436	3.57836	0.000345756	0.0185798	636	2.30592e-81	84.16
g442415.t1	bidirectional sugar transporter SWEET14-like	1.29666	537.03	0.392905	3.30018	0.000966245	0.041293	744	5.7911e-117	70.45
g10894.t1	NAD(P)H-quinone oxidoreductase subunit 2 B, chloroplastic	1.26487	7187.11	0.393006	3.21845	0.00128883	0.0499619	327	1.63575e-19	77.87
g100451.t1	uncharacterized protein LOC109832114	1.26309	231.222	0.352613	3.5821	0.000340847	0.0184483	408	5.04189e-41	65.68
g98910.t1	zinc finger CCCH domain-containing protein 29-like	1.26075	2347.38	0.254666	4.95063	7.39737e-07	0.000112425	1467	1.17176e-131	58.59
g183469.t1	Ribulose bisphosphate carboxylase large chain	1.26034	899.697	0.291074	4.32996	1.49138e-05	0.00148163	1017	3.19976e-34	93.81
g296060.t1	protein SRC2-like	1.25373	384.486	0.343777	3.64693	0.000265395	0.0153415	930	1.55526e-57	73.18
g135988.t1	protein PIN-LIKES 7-like	1.25328	1801.38	0.327203	3.83029	0.00012799	0.00869009	1329	0	77.61
g223202.t1	uncharacterized protein DS421_17g588830	1.25266	5360.12	0.294172	4.25827	2.06018e-05	0.00189876	426	1.40769e-71	90.45
g53475.t1	transcription factor MYB44-like	1.24989	549.888	0.377294	3.31277	0.000923762	0.0398485	732	7.33234e-63	59.12
g399103.t1	hypothetical protein KY290_010699	1.24305	15340.6	0.373621	3.32704	0.00087774	0.0384413	402	5.47795e-33	79.89
g281506.t1	protein BOBBER 1	1.23359	397.565	0.344784	3.57787	0.000346408	0.0185798	903	1.89128e-98	67.46
g55552.t1	hypothetical protein GOBAR_AA14981	1.23095	3623.5	0.36313	3.38984	0.000699329	0.0324926	732	1.38635e-115	82.46
g518049.t1	thiosulfate/3-mercaptopyruvate sulfurtransferase 1, mitochondrial-like isoform X1	1.22776	214.197	0.366047	3.3541	0.000796246	0.0358914	1326	0	83.47
g139416.t1	hypothetical protein BVC80_4285g1	1.21718	4690.63	0.37598	3.23734	0.00120649	0.047625	753	1.18672e-125	81.5
g527978.t1	probable helicase MAGATAMA 3	1.20809	1211.46	0.276912	4.36273	1.28451e-05	0.00131015	2406	0	80.56
g74593.t1	PREDICTED: uncharacterized protein LOC105126560 isoform X1	1.2046	373.452	0.315459	3.81857	0.000134229	0.00903346	1098	2.14568e-21	46.33
g525543.t1	DNA polymerase epsilon subunit C isoform X1	1.19636	1196.28	0.26303	4.54837	5.40628e-06	0.00060818	1110	6.45548e-63	58.76
g59630.t1	CBS domain-containing protein DDB_G0289609 isoform X2	1.17552	24392	0.323396	3.63494	0.000278049	0.0157554	648	2.22004e-74	79.67
g248406.t1	hypothetical protein ERO13_A05G323708v2, partial	1.16773	4120.78	0.317546	3.67736	0.000235657	0.0139025	237	1.87506e-32	93.71
g120799.t1	cystathionine beta-lyase, chloroplastic-like isoform X1	1.16027	281.86	0.339178	3.42082	0.00062432	0.030038	663	2.00918e-61	76.2
g120800.t1	cystathionine beta-lyase, chloroplastic isoform X2	1.14889	361.044	0.322421	3.56333	0.000366174	0.0194317	666	7.76057e-103	78.78
g63050.t1	uncharacterized protein LOC105035584 isoform X2	1.13906	256.497	0.339652	3.35362	0.000797622	0.0358914	666	1.82854e-24	59.48
g292060.t1	HMG1/2-like protein	1.13313	3973.97	0.214364	5.28599	1.25025e-07	2.43152e-05	480	3.67458e-25	85.65
g265324.t1	ubiquitin-fold modifier-conjugating enzyme 1	1.13007	221.676	0.333927	3.38418	0.00071392	0.0328991	540	5.12083e-118	96.41
g80965.t1	regulation of nuclear pre-mRNA domain-containing protein 1A-like	1.12415	441.849	0.332309	3.38286	0.00071736	0.0329666	1404	5.69682e-87	71.73
g454954.t1	sugar transporter ERD6-like 16	1.11809	1509.15	0.304015	3.67774	0.000235312	0.0139025	1536	0	79.06
g112463.t1	endoribonuclease Dicer homolog 2 isoform X1	1.11521	241.351	0.333322	3.34573	0.000820654	0.0367119	4473	0	69.86
g308748.t1	probable GTP-binding protein OBGC2 isoform X1	1.08699	1019.26	0.233731	4.65059	3.30979e-06	0.000401084	1497	0	81.47
g141053.t1	t-snare proteins protein	1.08658	259.291	0.337195	3.22241	0.00127119	0.049529	1020	1.99767e-80	60.12
g525577.t1	lactoylglutathione lyase-like	1.04497	3499.99	0.242723	4.30518	1.66851e-05	0.00158675	1074	0	94.22
g357958.t1	hypothetical protein HPP92_028428	1.03885	1090.89	0.28847	3.60124	0.000316703	0.0174906	363	7.25798e-73	88.75
g360453.t1	uncharacterized protein LOC109828002	1.03556	321.433	0.31169	3.32239	0.000892505	0.0388654	888	4.93424e-25	61.38
g27747.t1	beta-glucosidase 22-like	0.993967	706.916	0.280591	3.54241	0.000396492	0.0207742	1602	0	79.81
g154598.t1	probable beta-1,3-galactosyltransferase 2	0.968592	706.086	0.252703	3.83293	0.000126625	0.00862288	1749	0	90.51
g80570.t1	Bowman-Birk type trypsin inhibitor	0.944667	3475.72	0.270266	3.49533	0.000473481	0.0240929	399	1.11676e-16	55.29
g114341.t1	PREDICTED: uncharacterized protein LOC103998189 isoform X1	0.942021	442.215	0.287821	3.27294	0.00106436	0.0440109	777	8.70806e-09	63.34
g464721.t1	predicted protein	0.918291	685.249	0.275802	3.32952	0.000869944	0.0381727	345	7.74143e-16	60.29
g406669.t1	calcium-dependent protein kinase 3-like	0.874717	672.881	0.253273	3.45366	0.000553043	0.027353	1773	0	82.03
g503263.t1	GDP-L-galactose phosphorylase 1	0.870528	1651.66	0.229757	3.78891	0.000151312	0.009837	1275	0	91.43
g92614.t1	plasma membrane ATPase	-0.689805	6225.27	0.214469	-3.21634	0.00129835	0.0499929	2982	0	95.72
g135633.t1	NADP-dependent glyceraldehyde-3-phosphate dehydrogenase	-0.697481	4412.01	0.205281	-3.39769	0.000679584	0.0320901	1674	0	97.1
g216100.t1	probable pyridoxal 5'-phosphate synthase subunit PDX1	-0.697891	8854.48	0.213529	-3.26837	0.00108168	0.0445597	900	0	97.04
g99872.t1	phosphoribulokinase, chloroplastic	-0.705861	15285.7	0.216069	-3.26684	0.00108756	0.0445687	1227	0	91.26
g284725.t1	protein STRICTOSIDINE SYNTHASE-LIKE 4-like	-0.730886	1264.46	0.227165	-3.21743	0.00129347	0.0499727	1149	1.92914e-151	76.48
g288461.t1	glutathione S-transferase 3	-0.745893	4386.89	0.231905	-3.21637	0.00129824	0.0499929	639	2.44026e-155	79.22
g298260.t1	acetolactate synthase	-0.764713	4456.16	0.228864	-3.34134	0.000833757	0.0370812	2016	0	91.45
g453664.t1	putative plastid-lipid-associated protein 6, chloroplastic	-0.790927	2166.13	0.214071	-3.6947	0.000220144	0.0131223	822	1.03405e-103	85.6
g307098.t1	arginine decarboxylase-like	-0.795385	2573.72	0.241468	-3.29395	0.000987895	0.041609	1830	0	84.03
g359591.t1	F-box/kelch-repeat protein SKIP20-like	-0.82392	3283.71	0.228221	-3.61019	0.000305969	0.0170429	1329	1.91812e-89	59.16
g15532.t1	sedoheptulose-1,7-bisphosphatase, chloroplastic	-0.843361	6909.6	0.203791	-4.13835	3.49805e-05	0.00299541	1167	0	88.99
g475430.t1	fructose-bisphosphate aldolase, chloroplastic	-0.844408	111487	0.241789	-3.49233	0.000478822	0.0243108	1170	0	93.78
g206619.t1	ferredoxin-like	-0.852367	4173.83	0.229511	-3.71384	0.000204141	0.0124929	522	8.17453e-53	76.07
g208228.t1	photosynthetic NDH subunit of lumenal location 2, chloroplastic	-0.862287	1103.17	0.254955	-3.38212	0.000719294	0.0329666	552	2.45269e-78	85.98
g377453.t1	Ph-response transcription factor	-0.877824	859.028	0.267062	-3.28696	0.00101274	0.0424114	1023	4.21527e-103	65.05
g44346.t1	protein PHLOEM PROTEIN 2-LIKE A1-like	-0.881995	4666.74	0.240338	-3.66981	0.000242732	0.0142104	726	6.11141e-32	56.51
g487481.t1	glyceraldehyde-3-phosphate dehydrogenase GAPA1, chloroplastic isoform X1	-0.887736	34335.5	0.273934	-3.2407	0.00119237	0.0472604	1383	0	97.34
g113881.t1	heat shock protein 70	-0.889882	10302	0.237818	-3.74186	0.000182666	0.011485	1773	0	97.97
g459404.t1	branched-chain-amino-acid aminotransferase 3, chloroplastic-like	-0.892254	1753.61	0.217167	-4.10861	3.98052e-05	0.0032978	1317	8.93766e-169	81.21
g420151.t1	---NA---	-0.894548	2578.79	0.228668	-3.91199	9.15383e-05	0.00656473	549
g189661.t1	chloroplast stem-loop binding protein of 41 kDa a, chloroplastic	-0.926729	4898.05	0.243114	-3.81192	0.000137892	0.00917244	1209	0	88.71
g256884.t1	polyadenylate-binding protein 8-like	-0.929981	1506.98	0.25826	-3.60095	0.000317056	0.0174906	324	2.37305e-51	89.28
g350513.t1	50S ribosomal protein 6, chloroplastic	-0.935308	639.018	0.278588	-3.35732	0.000787019	0.0356239	492	6.97848e-18	82.92
g57174.t1	fructose-bisphosphate aldolase, chloroplastic	-0.937214	1802.33	0.229702	-4.08013	4.50102e-05	0.00361167	1386	0	94.51
g371638.t1	phospholipase A1-II 5	-0.940264	858.016	0.241015	-3.90127	9.56897e-05	0.00680275	1320	0	77.12
g57126.t1	V-type proton ATPase catalytic subunit A	-0.944888	510.574	0.275827	-3.42565	0.00061333	0.029804	1866	0	98.36
g90871.t1	uroporphyrinogen-III C-methyltransferase	-0.946267	486.7	0.284924	-3.32112	0.000896561	0.0389682	1074	2.46681e-156	80.02
g438446.t1	cyclic nucleotide-gated ion channel 4	-0.949484	1487.78	0.239559	-3.96346	7.38721e-05	0.00548638	2112	0	84.77
g362667.t1	probable 1-deoxy-D-xylulose-5-phosphate synthase, chloroplastic	-0.965367	2834.3	0.22516	-4.28747	1.80716e-05	0.00169275	2139	0	93.09
g423851.t1	CBL-interacting protein kinase 7	-0.969906	377.486	0.300083	-3.23213	0.0012287	0.0482009	867	1.62241e-59	65.7
g221486.t1	ribulose bisphosphate carboxylase small chain, chloroplastic-like	-0.985194	277475	0.260794	-3.77768	0.000158298	0.0102332	702	1.06731e-101	87.23
g205587.t1	glyceraldehyde-3-phosphate dehydrogenase B, chloroplastic	-0.985621	67454.4	0.227485	-4.33269	1.47301e-05	0.00146974	1368	0	92.9
g314446.t1	late embryogenesis abundant protein At5g17165-like isoform X1	-0.991349	852.014	0.242523	-4.08765	4.35759e-05	0.00353365	396	9.64522e-27	60.51
g466832.t1	P-loop containing nucleoside triphosphate hydrolase	-0.992863	1511.46	0.247188	-4.01663	5.90363e-05	0.00457711	2946	0	55.38
g437113.t1	2-alkenal reductase (NADP(+)-dependent)-like	-1.00133	738.521	0.2971	-3.37034	0.000750756	0.0341845	1032	0	89.5
g508647.t1	beta-carotene hydroxylase	-1.00366	1015.65	0.29499	-3.40235	0.000668084	0.0316629	1050	8.60574e-132	83.81
g4341.t1	fructose-bisphosphate aldolase, cytoplasmic isozyme 1	-1.01024	19990.5	0.271703	-3.71819	0.000200652	0.0123755	1161	0	93.11
g278300.t1	uncharacterized acetyltransferase At3g50280-like	-1.02807	346.429	0.312403	-3.29084	0.000998896	0.041908	1467	0	72.83
g195204.t1	putative quorum-sensing-regulated virulence factor	-1.03465	475.941	0.291226	-3.55272	0.000381265	0.0200221	867	1.02355e-50	75.05
g162870.t1	DAR GTPase 3, chloroplastic	-1.05863	283.421	0.320898	-3.29896	0.000970438	0.0413323	1098	0	88.89
g15550.t1	ATP synthase delta chain, chloroplastic-like	-1.08162	2423.01	0.237196	-4.56003	5.11458e-06	0.000578199	602	3.92411e-64	83.06
g239011.t1	Light-harvesting complex-like protein OHP2, chloroplastic	-1.08519	1835.79	0.235389	-4.6102	4.02275e-06	0.000471009	516	4.24273e-49	87.26
g296426.t1	phosphoglycerate kinase, chloroplastic	-1.08566	20968.4	0.314615	-3.45074	0.000559046	0.0275904	1533	0	95.78
g271236.t1	formamidase-like isoform X2	-1.09597	417.395	0.337739	-3.245	0.00117449	0.0469832	1371	0	93.22
g10810.t1	amidophosphoribosyltransferase, chloroplastic-like	-1.09804	343.158	0.327509	-3.35272	0.000800217	0.0359377	1620	0	86.41
g398054.t1	ribulose bisphosphate carboxylase/oxygenase activase	-1.09878	63851.9	0.209969	-5.23306	1.6673e-07	3.16222e-05	1329	0	92.37
g301440.t1	UBA-like protein	-1.10871	402.414	0.290517	-3.81635	0.000135443	0.0090797	1434	2.32774e-60	65.55
g424447.t1	protein TIC 55, chloroplastic	-1.11705	536.856	0.270643	-4.1274	3.66883e-05	0.00310687	828	1.47912e-142	79.96
g417517.t1	pyruvate decarboxylase 1	-1.11752	692.772	0.25843	-4.32427	1.53038e-05	0.00150962	1734	0	91.87
g98072.t1	peptidyl-prolyl cis-trans isomerase FKBP20-2, chloroplastic isoform X1	-1.1427	272.621	0.349727	-3.2674	0.0010854	0.0445597	720	1.9346e-117	88.41
g404701.t1	aspartyl protease family protein 2-like	-1.14314	259.123	0.350691	-3.25968	0.00111537	0.0451248	1968	0	80.43
g438046.t1	phosphatidylinositol 4-kinase gamma 4-like	-1.14756	272.195	0.321412	-3.57036	0.000356488	0.0190257	1851	0	79.65
g497685.t1	sulfite reductase [ferredoxin], chloroplastic-like	-1.1535	1076.99	0.337706	-3.41569	0.000636211	0.030481	1929	0	90.51
g536041.t1	chalcone isomerase	-1.15493	321.243	0.313247	-3.68697	0.000226938	0.0134922	897	2.81569e-157	85.6
g521554.t1	probable glutathione S-transferase DHAR2, chloroplastic	-1.15725	657.101	0.2899	-3.99189	6.55497e-05	0.00500505	1131	6.73924e-111	80.3
g488967.t1	probable metal-nicotianamine transporter YSL9	-1.1771	596.491	0.297668	-3.95442	7.67216e-05	0.00566136	1803	0	84.95
g201714.t1	tubulin alpha-2 chain	-1.20999	1088.29	0.260973	-4.63646	3.54426e-06	0.000421436	1425	0	86.23
g154905.t1	Ferredoxin [2Fe-2S] plant	-1.22986	4025.06	0.358191	-3.43355	0.000595741	0.0291507	420	9.24491e-51	89.02
g131356.t1	cysteine synthase	-1.25124	379.51	0.343553	-3.64207	0.000270456	0.0155167	243	9.63654e-39	91.82
g311691.t1	Rubredoxin-like superfamily protein	-1.25375	686.517	0.274883	-4.56103	5.09034e-06	0.000578199	528	1.92319e-70	79.93
g52468.t1	Expansin-A4	-1.26377	194.706	0.360284	-3.50772	0.000451966	0.0232039	861	3.46107e-157	94.35
g337499.t1	UTP--glucose-1-phosphate uridylyltransferase 3, chloroplastic	-1.26971	458.766	0.330975	-3.83627	0.000124919	0.00855753	2718	0	80.3
g445641.t1	29 kDa ribonucleoprotein A, chloroplastic	-1.29548	411.958	0.371729	-3.48501	0.00049211	0.0248897	1041	1.7245e-89	80.46
g274542.t1	F-box protein cpr1	-1.29723	574.743	0.279105	-4.64781	3.35479e-06	0.000403084	1026	7.36615e-43	49.11
g40278.t1	probable protein phosphatase 2C 33	-1.31174	405.398	0.37659	-3.48321	0.000495444	0.0249341	2685	0	77.48
g427009.t1	glutathione S-transferase T1	-1.31401	533.514	0.393708	-3.33753	0.000845252	0.0375197	858	1.85858e-104	78.85
g328260.t1	F-box/kelch-repeat protein	-1.31512	472.599	0.295697	-4.44754	8.68606e-06	0.000918601	1095	2.50874e-29	47.98
g332032.t1	uncharacterized protein LOC109841288	-1.31637	251.93	0.386667	-3.40439	0.000663115	0.0315723	513	2.72126e-91	92.62
g406450.t1	auxin response factor 1-like	-1.35501	329.046	0.399256	-3.39384	0.000689209	0.0322802	2211	0	75.23
g372097.t1	40S ribosomal protein S3-3	-1.35759	643.593	0.344649	-3.93905	8.18057e-05	0.00596955	333	3.99452e-65	94.72
g28446.t1	zinc finger protein 8	-1.35868	405.925	0.400759	-3.39026	0.000698269	0.0324926	627	4.9013e-36	53.52
g492190.t1	protein SLOW GREEN 1, chloroplastic-like	-1.35945	389.636	0.28639	-4.74686	2.06603e-06	0.000270933	1179	7.9711e-76	81.89
g343328.t1	protein SLOW GREEN 1, chloroplastic-like	-1.36582	306.064	0.3804	-3.5905	0.000330046	0.0180339	960	3.23733e-94	81.87
g327805.t1	cytochrome P450	-1.37279	367.597	0.346434	-3.96264	7.41254e-05	0.00548743	1782	0	81.7
g376504.t1	notchless protein homolog	-1.37383	160.527	0.394228	-3.48486	0.000492392	0.0248897	1410	0	85.39
g402387.t1	thiamine thiazole synthase 2, chloroplastic-like	-1.39311	56221.9	0.241556	-5.76724	8.05811e-09	2.10143e-06	1083	0	92.15
g163471.t1	probable aquaporin TIP2-1	-1.41156	440.687	0.290798	-4.8541	1.20933e-06	0.000171314	744	2.25909e-133	92.42
g303322.t1	chitinase 10-like	-1.42001	204.058	0.435554	-3.26023	0.00111321	0.0451248	837	1.2329e-150	84.24
g373285.t1	ribulose bisphosphate carboxylase small chain, chloroplastic-like	-1.42845	72917.7	0.349054	-4.09234	4.27041e-05	0.00347524	516	3.96354e-101	82.91
g427880.t1	ATP synthase subunit delta, chloroplastic-like	-1.42985	385.843	0.284375	-5.02806	4.95473e-07	7.95148e-05	279	3.98179e-44	92.68
g282819.t1	Tetrapyrrole-binding protein, chloroplastic	-1.43374	721.101	0.387684	-3.69823	0.000217106	0.0129749	513	5.44685e-35	86.65
g374889.t1	protein MAINTENANCE OF PSII UNDER HIGH LIGHT 1	-1.43686	383.376	0.360688	-3.98366	6.78628e-05	0.00510618	672	4.07806e-37	83.4
g282818.t1	tetrapyrrole-binding protein, chloroplastic	-1.44529	189.653	0.362774	-3.98399	6.77669e-05	0.00510618	279	1.36854e-29	83.77
g515946.t1	putative pumilio homolog 7, chloroplastic	-1.44928	3508.38	0.436146	-3.32292	0.000890809	0.0388654	1722	0	77.08
g74120.t1	long chain acyl-CoA synthetase 2	-1.4589	104.46	0.424146	-3.43963	0.000582512	0.0285643	1995	0	84.19
g25065.t1	protein RETICULATA-RELATED 3, chloroplastic-like	-1.46213	179.85	0.352063	-4.15304	3.28088e-05	0.00283056	1053	2.41938e-107	84.96
g424446.t1	protein TIC 55, chloroplastic	-1.4781	312.016	0.358287	-4.12545	3.70004e-05	0.00311612	750	3.78576e-73	79.55
g343193.t1	UDP-glucose: anthocyanidin 3-O-glucosyltransferase	-1.50193	477.88	0.345318	-4.34942	1.36496e-05	0.00137993	1353	0	68.07
g378730.t1	acyl transferase 4	-1.51451	257.154	0.447892	-3.38142	0.00072113	0.0329666	1248	0	68.31
g38927.t1	strigolactone esterase D14	-1.52226	351.924	0.385091	-3.953	7.71781e-05	0.0056768	990	3.545e-99	72.66
g360967.t1	0	-1.52441	316.779	0.34031	-4.47947	7.48281e-06	0.000813853	807
g234262.t1	F-box protein CPR30-like	-1.52499	204.653	0.405216	-3.76339	0.000167623	0.0107152	486	8.04347e-09	50.04
g332039.t1	nuclear protein	-1.53164	1057.86	0.329635	-4.64646	3.37673e-06	0.000403608	903	1.29967e-151	89.47
g299802.t1	pentatricopeptide repeat-containing protein At1g09900-like	-1.54021	656.308	0.326496	-4.71738	2.38904e-06	0.000302907	2055	0	80.66
g234253.t1	F-box/kelch-repeat protein At3g06240-like	-1.54613	238.728	0.399522	-3.86995	0.000108856	0.00763955	813	3.15387e-25	48.61
g304912.t1	cysteine proteinase inhibitor 1-like	-1.55472	261.839	0.386182	-4.02587	5.67644e-05	0.00441589	498	2.91891e-30	73.29
g491925.t1	17.8 kDa class I heat shock protein-like	-1.56114	290.545	0.35917	-4.34653	1.38309e-05	0.00139212	594	3.03441e-72	89.2
g432759.t1	elongation factor 1-alpha	-1.56556	300.977	0.387755	-4.03749	5.4027e-05	0.00425009	513	1.27253e-105	97.24
g383247.t1	inter alpha-trypsin inhibitor, heavy chain 4-like	-1.57637	327.483	0.305516	-5.1597	2.47352e-07	4.43474e-05	2763	0	75.95
g188035.t1	scarecrow-like protein 6	-1.58869	311.073	0.34088	-4.66056	3.15348e-06	0.000384942	2415	1.51921e-175	75.04
g213320.t1	6-phosphofructo-2-kinase/fructose-2,6-bisphosphatase isoform X1	-1.62977	182.977	0.371306	-4.38927	1.13731e-05	0.001181	2415	0	85.4
g493607.t1	serine carboxypeptidase-like 18	-1.63098	346.743	0.445214	-3.66337	0.000248922	0.0144621	1413	1.80527e-179	70.71
g53139.t1	branched-chain-amino-acid aminotransferase 3, chloroplastic-like	-1.63314	1230.45	0.251577	-6.49163	8.49144e-11	3.47982e-08	1212	5.99391e-169	78.98
g376433.t1	F-box protein At1g11270-like	-1.64734	70.3044	0.502693	-3.27703	0.00104906	0.0435351	1299	1.15232e-41	55.19
g513570.t1	sulfite exporter TauE/SafE family protein 4	-1.72408	316.161	0.366987	-4.69792	2.62818e-06	0.000326022	1374	0	83.36
g304621.t1	protein ECERIFERUM 26-like	-1.74386	116.965	0.48066	-3.62805	0.000285575	0.0160629	1272	2.11168e-146	63.08
g442380.t1	pentatricopeptide repeat-containing protein At3g49170, chloroplastic	-1.76875	245.807	0.421486	-4.19647	2.71106e-05	0.00237466	2430	0	77.83
g81767.t1	probable mannitol dehydrogenase	-1.79493	223.449	0.445036	-4.03323	5.50156e-05	0.00430906	1143	0	83.93
g74512.t1	glycine-rich domain-containing protein 1	-1.8082	452.648	0.525111	-3.44346	0.000574326	0.0282837	2472	0	71.12
g275014.t1	protein NRT1/ PTR FAMILY 3.1-like	-1.84167	219.455	0.432229	-4.26087	2.03637e-05	0.00188438	1746	0	81.58
g506459.t1	protein PHOSPHATE-INDUCED 1 homolog	-1.86852	417.052	0.363884	-5.13492	2.82258e-07	4.87033e-05	930	1.04392e-162	85.45
g344152.t1	pectinesterase-like	-1.89072	365.072	0.293084	-6.45113	1.11017e-10	4.46971e-08	1692	0	75.88
g449128.t1	IAA-amino acid hydrolase ILR1-like 5	-1.89874	118.451	0.412116	-4.6073	4.07935e-06	0.000472813	1329	0	82.98
g337840.t1	probable plastidic glucose transporter 1	-1.9092	158.579	0.501636	-3.80595	0.00014126	0.00934227	1533	0	83.41
g422708.t1	cytochrome P450 71A1-like	-1.92298	495.235	0.538574	-3.57051	0.000356284	0.0190257	1503	0	72.59
g368394.t1	importin subunit beta-1-like	-1.92432	83.2341	0.554745	-3.46884	0.000522715	0.0260778	2616	0	86.98
g108212.t1	polygalacturonase inhibitor-like	-1.92942	307.983	0.41174	-4.68603	2.78558e-06	0.00034369	1047	4.33488e-73	58.51
g387018.t1	UDP-arabinopyranose mutase 1-like	-1.93022	115.402	0.530199	-3.64056	0.000272043	0.0155301	1278	0	93.72
g493752.t1	probable polygalacturonase	-1.93245	382	0.578041	-3.3431	0.000828489	0.0369185	1422	0	82.92
g227658.t1	Trans-cinnamate 4-monooxygenase	-1.95513	478.471	0.294298	-6.64339	3.06554e-11	1.35291e-08	1704	0	96.33
g224956.t1	glycine-rich family protein	-1.96232	128.593	0.559201	-3.50915	0.000449536	0.023131	348	2.22545e-10	89.31
g278967.t1	phenylalanine ammonia-lyase	-2.01213	778.323	0.300437	-6.69734	2.12253e-11	1.01479e-08	2127	0	91.11
g317717.t1	Pectinesterase protein	-2.02595	731.557	0.408992	-4.95352	7.28815e-07	0.000112252	1989	0	70.65
g327679.t1	7-deoxyloganetic acid glucosyltransferase	-2.04519	356.074	0.476718	-4.29014	1.78557e-05	0.00167939	1461	4.89562e-163	65.3
g376482.t1	uncharacterized protein LOC109823624	-2.05545	153.731	0.425396	-4.83186	1.35266e-06	0.000187001	1101	0	81.35
g288965.t1	21 kDa protein-like	-2.05789	4070.81	0.496308	-4.1464	3.37745e-05	0.00290296	594	4.6956e-54	76.69
g438732.t1	alanine--glyoxylate aminotransferase 2 homolog 3, mitochondrial-like	-2.06126	153.248	0.380454	-5.4179	6.0303e-08	1.28138e-05	1605	0	88.47
g426356.t1	nitrate reductase [NADH]	-2.08189	4512.24	0.336061	-6.19498	5.82931e-10	2.09026e-07	2907	0	87.34
g301438.t1	cyclin-U1-1	-2.09834	332.313	0.422926	-4.96148	6.99591e-07	0.000108479	642	7.4039e-68	76.17
g48976.t1	purine-uracil permease NCS1-like	-2.11554	129.761	0.427302	-4.95092	7.38625e-07	0.000112425	1608	0	84.84
g50966.t1	O-acyltransferase WSD1-like	-2.11566	343.613	0.348362	-6.07315	1.25425e-09	3.78734e-07	1422	0	74.06
g533872.t1	amino acid permease 3	-2.13161	266.204	0.320817	-6.6443	3.04652e-11	1.35291e-08	1092	0	87.85
g509637.t1	acyl-coenzyme A thioesterase 9, mitochondrial	-2.16163	136.802	0.603171	-3.58377	0.000338666	0.0183826	1443	0	88.45
g345091.t1	probable boron transporter 2	-2.16183	425.337	0.361047	-5.98766	2.12885e-09	6.26346e-07	2574	0	89.98
g184722.t1	transcription factor TCP4	-2.18214	157.001	0.422649	-5.163	2.43022e-07	4.39416e-05	1260	4.73416e-84	59.13
g307186.t1	phosphomethylethanolamine N-methyltransferase-like isoform X2	-2.19071	784.08	0.395534	-5.53861	3.04879e-08	6.9274e-06	1479	0	92.38
g196555.t1	F-box only protein 6-like	-2.19253	133.074	0.489068	-4.48308	7.35743e-06	0.000804027	1026	8.02362e-82	59.78
g286633.t1	gibberellin 3-beta-dioxygenase 1	-2.20989	406.37	0.406018	-5.44284	5.24363e-08	1.12464e-05	1098	0	76.86
g463638.t1	WD-40 repeat-containing protein MSI4-like	-2.24761	154.175	0.485792	-4.62669	3.71549e-06	0.000437266	1386	0	84.26
g219733.t1	receptor-like serine/threonine-protein kinase ALE2 isoform X1	-2.26631	81.8242	0.527973	-4.29248	1.76691e-05	0.00166867	2382	0	70.68
g86487.t1	probable glutamate carboxypeptidase VP8 isoform X1	-2.27185	46.0637	0.701831	-3.23703	0.0012078	0.047625	2457	0	73.71
g482454.t1	eukaryotic peptide chain release factor subunit 1-3-like	-2.27844	90.1528	0.551528	-4.13114	3.60974e-05	0.00307955	1311	0	96.48
g7699.t1	cinnamoyl-CoA reductase-like SNL6	-2.28895	86.457	0.556265	-4.11486	3.87411e-05	0.00322126	1134	2.3324e-119	70.14
g369261.t1	D-amino-acid transaminase, chloroplastic-like isoform X1	-2.30655	263.616	0.369392	-6.24418	4.26037e-10	1.57696e-07	852	6.33197e-166	88.27
g104215.t1	diacylglycerol kinase 1	-2.30698	77.3556	0.515621	-4.47419	7.67021e-06	0.0008303	2037	0	76.27
g138720.t1	protein IQ-DOMAIN 31-like	-2.31877	136.541	0.424939	-5.45671	4.85048e-08	1.05013e-05	1212	2.69406e-94	59.41
g535320.t1	auxin-induced protein 22D-like	-2.32337	70.2033	0.571561	-4.06496	4.80417e-05	0.00382815	456	5.92909e-56	63.7
g41054.t1	protodermal factor 1-like	-2.3324	248.442	0.671399	-3.47395	0.000512863	0.0257116	684	3.79683e-36	72.09
g323104.t1	pyrrolidone-carboxylate peptidase	-2.33444	53.6154	0.598825	-3.89836	9.68461e-05	0.00683852	810	1.37738e-104	70.51
g499593.t1	protein NLP1-like	-2.33833	49.0721	0.652499	-3.58365	0.00033883	0.0183826	2598	0	64.03
g439426.t1	protein DETOXIFICATION 40-like	-2.34001	390.559	0.547267	-4.27581	1.90442e-05	0.00177661	1464	0	89.53
g333242.t1	probable mannose-1-phosphate guanylyltransferase 1	-2.35606	126.631	0.458476	-5.13889	2.76364e-07	4.84144e-05	1296	0	92.2
g525009.t1	myb-related protein P-like	-2.39879	64.4038	0.732124	-3.27648	0.00105109	0.0435405	1134	1.4674e-107	76.14
g121794.t1	serine/threonine-protein phosphatase PP-X isozyme 2	-2.41823	46.2886	0.694194	-3.48351	0.000494892	0.0249341	1155	7.00527e-66	72.43
g478079.t1	protein IQ-DOMAIN 1-like	-2.4287	55.4733	0.626641	-3.87574	0.000106301	0.00748311	1260	9.76954e-77	71.93
g90329.t1	auxin-responsive protein SAUR68-like	-2.4525	145.709	0.707904	-3.46445	0.000531314	0.0263921	411	3.21892e-38	75.9
g93115.t1	auxin-responsive protein SAUR68-like	-2.46806	93.8792	0.677354	-3.64368	0.000268769	0.0154586	417	1.14961e-32	70.18
g174955.t1	UDP-glucose: anthocyanidin 3-O-glucosyltransferase	-2.47535	111.418	0.488603	-5.06618	4.05887e-07	6.65335e-05	1338	1.37035e-80	54.3
g532377.t1	putative disease resistance protein RGA3	-2.55362	551.236	0.302426	-8.44379	3.0722e-17	3.06539e-14	3171	3.94696e-98	48.92
g259833.t1	alkane hydroxylase MAH1-like	-2.58551	114.497	0.720581	-3.58809	0.000333107	0.0181579	1485	0	71.99
g125293.t1	glucan endo-1,3-beta-glucosidase	-2.63443	227.699	0.768063	-3.42996	0.00060366	0.0294753	990	0	78.53
g167946.t1	tyrosine/DOPA decarboxylase 2-like protein	-2.6514	239.899	0.786813	-3.36979	0.000752242	0.0341845	1737	0	86.38
g124080.t1	auxin-responsive protein IAA6-like	-2.6966	77.1997	0.633996	-4.25334	2.10602e-05	0.00192554	669	9.23099e-49	54.76
g250752.t1	DVL protein	-2.70733	75.6831	0.59752	-4.53094	5.87211e-06	0.000654838	318	5.23425e-18	57.23
g367838.t1	protein ECERIFERUM 1-like	-2.72342	60.2272	0.727203	-3.74506	0.000180354	0.011402	1911	0	82.97
g47731.t1	flavonol synthase	-2.75775	938.501	0.536232	-5.14283	2.70627e-07	4.7774e-05	1008	0	90.72
g257103.t1	sucrose:sucrose 1-fructosyltransferase-like	-2.7798	161.998	0.455698	-6.10009	1.06007e-09	3.2875e-07	2160	0	74.42
g89994.t1	flavonoid 3'-hydroxylase	-2.80187	158.72	0.575159	-4.87147	1.10772e-06	0.000160943	1533	0	82.24
g344283.t1	auxin-responsive protein SAUR68-like	-2.81053	43.6958	0.865768	-3.24628	0.00116922	0.0469098	411	8.88722e-38	75.7
g139437.t1	phosphomannomutase	-2.81895	169.855	0.422073	-6.67883	2.40854e-11	1.10547e-08	960	4.47802e-167	94.73
g149454.t1	acyl-carrier-protein phosphodiesterase PptH-like isoform X1	-2.86864	55.1904	0.726824	-3.94682	7.91963e-05	0.00580663	1107	0	83.01
g44756.t1	early light-induced protein 1, chloroplastic-like	-2.87681	224.427	0.839359	-3.42739	0.000609407	0.0296927	573	2.57853e-62	67.89
g187667.t1	auxin-responsive protein SAUR50-like	-2.90044	185.598	0.508928	-5.69911	1.20433e-08	3.00415e-06	297	6.92842e-41	79.22
g363469.t1	auxin-responsive protein SAUR64	-2.95275	66.7175	0.744145	-3.96797	7.24866e-05	0.00540095	1092	1.421e-24	69
g495157.t1	protein kinase PINOID-like	-2.95518	260.54	0.412661	-7.16128	7.99297e-13	5.39502e-10	1233	1.57273e-147	73.4
g497849.t1	carboxyl-terminal-processing peptidase 1, chloroplastic-like	-2.96583	152.381	0.655489	-4.52461	6.05076e-06	0.000670816	1242	1.76226e-129	83.83
g22019.t1	auxin-responsive protein SAUR68-like	-2.97367	189.894	0.706717	-4.20773	2.5795e-05	0.0022856	417	1.74638e-34	68.68
g395533.t1	protein REVEILLE 6-like	-3.00566	38.6197	0.810136	-3.71006	0.000207208	0.0125516	1200	2.06384e-62	77.65
g475664.t1	polygalacturonase At1g48100-like	-3.04295	228.147	0.921493	-3.3022	0.000959293	0.0410724	1506	0	88.45
g158140.t1	serine/threonine-protein kinase UCNL-like	-3.04948	35.0322	0.820959	-3.71453	0.00020358	0.0124919	1488	1.58478e-120	66.85
g221173.t1	probable inactive purple acid phosphatase 27	-3.0582	418.108	0.298137	-10.2577	1.09266e-24	4.17925e-21	2007	0	81.28
g338955.t1	zinc transporter 7	-3.06764	264.038	0.826609	-3.71111	0.000206354	0.0125516	1197	2.62421e-137	83.08
g66842.t1	probable boron transporter 2	-3.09243	32.3984	0.789565	-3.91662	8.97988e-05	0.00648048	1530	0	95.05
g308828.t1	ribosomal RNA small subunit methyltransferase	-3.09938	108.547	0.900304	-3.44259	0.000576173	0.0283139	1086	0	84.15
g6165.t1	protein disulfide-isomerase 5-2-like	-3.11016	40.7446	0.731199	-4.25351	2.10448e-05	0.00192554	516	2.27882e-12	51.07
g285276.t1	auxin-responsive protein SAUR68-like	-3.11352	214.565	0.458723	-6.78738	1.1419e-11	5.9558e-09	411	5.76397e-41	70.74
g347444.t1	probable 4-coumarate--CoA ligase 2	-3.12633	471.513	0.611584	-5.11186	3.19001e-07	5.46324e-05	1791	0	80.27
g471865.t1	Nucleosome assembly	-3.13408	244.2	0.349343	-8.97136	2.92865e-19	4.48063e-16	657	5.08211e-103	81.91
g62041.t1	plastidal glycolate/glycerate translocator 1, chloroplastic	-3.18374	37.1899	0.842963	-3.77685	0.000158825	0.0102384	1014	3.06533e-64	92.67
g249170.t1	beta-fructofuranosidase, insoluble isoenzyme 4-like	-3.18924	73.4875	0.740899	-4.30455	1.67325e-05	0.00158675	1665	0	72.65
g93056.t1	auxin-responsive protein SAUR68-like	-3.22021	55.7355	0.676392	-4.76087	1.92764e-06	0.000255708	417	3.13374e-32	67.07
g91786.t1	putative ABC transporter C family member 15	-3.22365	618.943	0.617318	-5.22202	1.76978e-07	3.32906e-05	4344	0	81.73
g294412.t1	MADS-box protein CMB1	-3.22831	39.5561	0.906027	-3.56315	0.000366433	0.0194317	1281	6.78553e-160	80.02
g419886.t1	probable polyamine aminopropyl transferase isoform X1	-3.25245	135.116	0.527133	-6.17008	6.82562e-10	2.37335e-07	987	4.11176e-115	78.35
g257636.t1	mitochondrial inner membrane protease ATP23	-3.27844	47.5378	0.823598	-3.98063	6.87322e-05	0.00515469	549	2.58347e-109	87.9
g108366.t1	uncharacterized protein LOC112505014	-3.32425	41.4391	0.811917	-4.09432	4.23404e-05	0.0034579	693	1.29541e-17	56.79
g390375.t1	transcription factor HEC2-like	-3.45898	165.094	0.918523	-3.7658	0.000166015	0.0106421	564	9.14475e-45	82.91
g298547.t1	flavanone 3-hydroxylase	-3.49752	641.368	0.498507	-7.01599	2.28333e-12	1.31e-09	1104	0	92.21
g485001.t1	auxin-responsive protein SAUR50-like	-3.50906	41.6798	1.00164	-3.50333	0.000459486	0.023485	297	2.77826e-46	82.26
g529497.t1	F-box/kelch-repeat protein	-3.55792	61.5825	0.677022	-5.25525	1.47822e-07	2.82697e-05	1110	2.78695e-36	48.07
g352717.t1	low affinity sulfate transporter 3	-3.56116	580.219	0.388819	-9.15893	5.24135e-20	8.5917e-17	2115	0	80.13
g421481.t1	cytochrome P450 704C1-like	-3.57735	358.179	0.810206	-4.41536	1.00842e-05	0.00106157	1500	0	77.41
g530533.t1	thaumatin-like protein 1	-3.68143	90.0781	0.620809	-5.93005	3.02849e-09	8.66327e-07	1023	1.34683e-104	68.97
g113780.t1	uncharacterized protein LOC109836092	-3.71916	203.52	0.74185	-5.01336	5.34879e-07	8.52426e-05	780	3.3378e-81	63.17
g290913.t1	cytochrome P450 71A1-like	-3.72133	733.802	0.513721	-7.24387	4.36072e-13	3.03255e-10	1533	0	73.19
g531992.t1	polyadenylate-binding protein-interacting protein 11-like isoform X3	-3.72928	20.1633	1.0889	-3.42483	0.000615184	0.029804	1320	4.27743e-92	84.79
g261474.t1	cactin isoform X2	-3.86064	40.3978	0.821521	-4.69938	2.60955e-06	0.000325471	1599	0	73.94
g128859.t1	hypothetical protein IFM89_020377	-3.8896	27.8102	1.04627	-3.71758	0.000201144	0.0123755	1470	1.96352e-44	50.36
g340390.t1	WAT1-related protein At5g64700-like isoform X1	-3.94125	27.8995	0.972541	-4.05253	5.06663e-05	0.00402332	849	5.94502e-24	72.5
g92411.t1	oleosin 16 kDa	-3.97335	28.796	1.03108	-3.85357	0.000116408	0.00810143	567	7.28119e-18	82.16
g73851.t1	auxin-responsive protein SAUR50-like	-4.01529	69.4048	0.817844	-4.90961	9.12571e-07	0.000135991	405	5.37001e-46	81.18
g403282.t1	21 kDa protein-like	-4.06726	25.0946	1.03636	-3.92455	8.68923e-05	0.00629051	615	1.43486e-57	69.7
g312334.t1	putative alpha/beta hydrolase-1	-4.07522	30.6374	1.2171	-3.34831	0.000813055	0.036443	1137	9.19811e-153	73.24
g470704.t1	F-box protein FBW2-like	-4.08984	20.508	1.10351	-3.7062	0.000210392	0.012706	855	1.49129e-79	65.55
g30174.t1	putative disease resistance protein RGA3	-4.27654	33.3788	1.21233	-3.52755	0.000419423	0.0217768	2175	2.612e-37	54.15
g354314.t1	---NA---	-4.28495	23.9126	1.23619	-3.46627	0.000527737	0.0262712	492
g498766.t1	cytochrome P450 734A6-like	-4.38338	19.3434	1.32917	-3.29783	0.000974368	0.0413323	1716	0	85.57
g384237.t1	putative RING-H2 finger protein ATL53	-4.4507	18.8788	1.22374	-3.63697	0.000275866	0.0156704	279	5.76052e-05	66.37
g153067.t1	cytochrome P450 81Q32-like	-4.56488	89.3736	0.884172	-5.16288	2.43173e-07	4.39416e-05	1224	3.2801e-153	66.07
g93169.t1	amino acid transporter AVT6C	-4.80752	16.1364	1.45919	-3.29464	0.000985462	0.041609	1095	4.96018e-131	75.52
g284885.t1	chalcone synthase 3	-4.90657	1232.23	1.30455	-3.76112	0.000169157	0.0107833	1383	0	93.5
g100877.t1	peroxidase 64	-4.93823	106.856	1.14207	-4.32393	1.53271e-05	0.00150962	6090	0	65.11
g39746.t1	probable beta-D-xylosidase 7	-4.96416	110.398	0.60451	-8.21186	2.17782e-16	1.99915e-13	2313	0	79.5
g208863.t1	glycerol-3-phosphate 2-O-acyltransferase 6	-4.96824	74.4663	0.921826	-5.38957	7.06281e-08	1.47349e-05	1065	1.20066e-179	80.25
g7836.t1	tyrosine decarboxylase 1	-5.02461	77.5528	1.09014	-4.60915	4.04326e-06	0.000471009	1224	0	86.71
g101659.t1	cytochrome P450 734A6-like	-5.07772	110.447	0.6469	-7.84931	4.18326e-15	3.69237e-12	1557	0	81.59
g190701.t1	cytochrome P450 71A1-like	-5.25159	186.853	0.596305	-8.80687	1.28684e-18	1.73716e-15	1494	0	74.33
g160338.t1	photosystem II 22 kDa protein, chloroplastic	-5.33441	6979.86	0.247564	-21.5476	5.57901e-103	1.28033e-98	978	7.10434e-92	88.92
g49756.t1	inorganic pyrophosphatase 1-like	-5.37106	24.0691	1.64731	-3.26051	0.00111211	0.0451248	828	4.54757e-132	80.04
g167968.t1	Ubiquitin-like proteins protein	-5.37754	47.2953	1.00735	-5.3383	9.38216e-08	1.88869e-05	630	2.75498e-45	70.21
g266652.t1	serine/threonine-protein kinase STY46-like isoform X3	-5.44118	174.212	0.587437	-9.26258	1.99546e-20	3.5226e-17	714	1.01906e-22	49.24
g208862.t1	glycerol-3-phosphate 2-O-acyltransferase 6-like	-5.52382	190.109	0.734786	-7.51759	5.57939e-14	4.26805e-11	1371	0	89.87
g162436.t1	Protein-serine/threonine phosphatase protein	-5.68147	29.8233	1.25399	-4.53073	5.8781e-06	0.000654838	1452	1.13144e-93	76.58
g476065.t1	meiosis regulator and mRNA stability factor 1	-5.77752	16.1011	1.74781	-3.30557	0.000947832	0.0407337	2310	1.82917e-62	66.96
g49358.t1	WAT1-related protein At5g47470-like isoform X1	-5.97822	90.6446	1.11062	-5.38277	7.3349e-08	1.51647e-05	1554	5.64877e-114	70.72
g296540.t1	mediator of RNA polymerase II transcription subunit 22a	-5.97986	18.2318	1.78267	-3.35445	0.000795236	0.0358914	510	3.17458e-09	70.65
g62967.t1	DELLA protein SLR1	-6.0171	414.293	0.45041	-13.3592	1.04708e-40	1.20147e-36	1338	0	85.05
g152076.t1	Cytochrome P450 84A1	-6.0214	165.96	0.848576	-7.09589	1.28522e-12	8.19295e-10	1677	0	84.46
g26999.t1	Glycine-rich RNA-binding protein 3, mitochondrial	-6.09083	19.6061	1.79889	-3.38589	0.000709482	0.0328601	402	2.57127e-28	70.51
g267659.t1	bifunctional protein FolD 4, chloroplastic	-6.09383	40.6728	1.49289	-4.08191	4.46667e-05	0.00359669	1983	9.95428e-106	92.54
g382888.t1	laccase-3	-6.16747	20.5627	1.85012	-3.33355	0.000857445	0.0377687	1704	0	85.76
g282242.t1	putative disease resistance protein RGA3	-6.3006	45.9395	1.20763	-5.21734	1.81511e-07	3.38658e-05	837	5.23027e-35	61.43
g420150.t1	---NA---	-6.36811	46.1625	1.24	-5.13558	2.81275e-07	4.87033e-05	249
g10137.t1	cactin isoform X2	-6.51361	9.61658	2.02416	-3.21793	0.00129119	0.049969	3144	0	72.76
g348134.t1	glycosyltransferase BC10-like	-6.52205	9.56995	2.00649	-3.25047	0.00115213	0.0463052	540	5.83582e-10	56.64
g224769.t1	probable acyl-activating enzyme 5, peroxisomal	-6.56591	27.1501	1.64213	-3.9984	6.37721e-05	0.00491109	2562	0	81.34
g199656.t1	---NA---	-6.58732	10.0272	1.99987	-3.29388	0.000988142	0.041609	612
g474445.t1	DNA-directed RNA polymerase I subunit rpa49	-6.64476	10.4988	2.01659	-3.29505	0.000984052	0.041609	828	1.21484e-88	64.82
g526630.t1	clathrin coat assembly protein AP180-like	-6.64491	10.4749	2.05703	-3.23034	0.00123642	0.0483382	1242	5.50715e-134	67.04
g126559.t1	G-type lectin S-receptor-like serine/threonine-protein kinase LECRK2	-6.65606	28.9583	1.62891	-4.0862	4.385e-05	0.00354336	2523	0	65.14
g58806.t1	probable serine/threonine-protein kinase PBL7	-6.68583	10.8004	1.95226	-3.42465	0.000615586	0.029804	1032	1.08042e-84	60.42
g219496.t1	GDSL esterase/lipase At4g26790-like	-6.75896	11.3341	2.08422	-3.24292	0.00118313	0.0469832	1257	8.47848e-174	81.05
g512269.t1	---NA---	-6.78439	189.252	0.720854	-9.4116	4.88631e-21	9.34466e-18	1839
g75332.t1	15-cis-phytoene desaturase, chloroplastic/chromoplastic	-6.80595	204.394	1.77891	-3.82591	0.000130289	0.00879416	1368	0	80.03
g234809.t1	momilactone A synthase-like	-6.80682	11.7102	1.9293	-3.52813	0.000418503	0.0217768	819	2.34958e-111	78.31
g136893.t1	V-type proton ATPase subunit C	-6.8387	11.9396	1.92391	-3.55458	0.000378579	0.0199724	627	1.36885e-108	94.56
g67114.t1	probable histone H2B.1	-6.92269	34.6756	1.60309	-4.31833	1.57211e-05	0.00153715	1314	2.68628e-58	94.79
g207422.t1	prostaglandin reductase-3	-6.93018	12.8057	2.07224	-3.34429	0.000824926	0.0368312	846	7.42681e-124	79.88
g248193.t1	chlorophyll a-b binding protein 50, chloroplastic	-6.94218	178.391	2.15504	-3.22138	0.00127576	0.0496229	702	7.23671e-156	96.59
g252955.t1	cellulose synthase-like protein H1	-6.96658	13.0768	1.86951	-3.72643	0.000194213	0.0120364	693	4.43234e-29	67.56
g61233.t1	ribosomal protein L31	-6.9755	13.1736	1.8678	-3.7346	0.000188015	0.0117249	756	5.23627e-33	89.04
g339144.t1	histone H2A	-7.02393	13.4871	1.91677	-3.66447	0.000247856	0.0144366	474	7.94426e-46	97
g502625.t1	putative transferase At1g60990, chloroplastic	-7.03995	76.0979	1.1477	-6.13395	8.57229e-10	2.84329e-07	984	3.31453e-111	80.15
g104841.t1	malonyl-coenzyme A:anthocyanin 3-O-glucoside-6''-O-malonyltransferase-like	-7.11644	39.5995	1.6126	-4.41304	1.01931e-05	0.00106813	1329	2.058e-82	54.14
g443353.t1	Aromatic-L-amino-acid decarboxylase	-7.11819	14.3503	1.84107	-3.86633	0.000110487	0.00773039	399	3.24942e-09	84.72
g285856.t1	histone H2A	-7.14806	14.7187	1.85501	-3.85338	0.000116496	0.00810143	489	2.2328e-52	98.56
g267308.t1	BTB/POZ domain-containing protein NPY1	-7.19071	15.3791	1.94086	-3.70491	0.000211464	0.0127372	1812	0	78.82
g6081.t1	transcription initiation factor IIB	-7.25319	15.9411	1.82017	-3.9849	6.7509e-05	0.00510618	600	1.66643e-11	50.6
g535633.t1	importin subunit beta-1-like	-7.26775	16.1148	1.81988	-3.99353	6.50981e-05	0.00499644	813	6.1764e-118	82.42
g32747.t1	retrovirus-related pol polyprotein from transposon tnt 1-94	-7.31889	16.6039	2.24099	-3.26592	0.00109109	0.0446334	549	1.58644e-56	74.05
g408453.t1	chloroplastic early light-induced protein	-7.36678	17.243	2.27744	-3.23467	0.00121783	0.0479382	567	2.18638e-64	70.57
g156895.t1	pentatricopeptide repeat-containing protein At3g61520, mitochondrial-like	-7.44774	50.236	1.57206	-4.73757	2.16296e-06	0.000281384	978	1.32088e-48	50.03
g167142.t1	high-affinity nitrate transporter 3.1	-7.53634	19.4155	2.21242	-3.40639	0.000658292	0.0314078	609	3.55671e-66	74.97
g229983.t1	transcription factor IBH1-like	-7.56791	19.4702	2.31878	-3.26375	0.00109949	0.0448174	333	8.33353e-15	77.67
g380498.t1	cysteine synthase-like	-7.57275	163.314	0.919082	-8.23947	1.72974e-16	1.65399e-13	720	1.90449e-125	74.92
g60471.t1	50S ribosomal protein L27-like	-7.5936	54.897	1.60399	-4.7342	2.19923e-06	0.00028354	777	3.55719e-65	93.24
g32962.t1	Retrovirus-related Pol polyprotein from transposon TNT 1-94	-7.63553	20.8491	2.20979	-3.45532	0.00054963	0.0272429	1923	3.4212e-143	61.2
g20159.t1	transcription factor PAR2-like	-7.64539	56.7017	1.81877	-4.20362	2.62683e-05	0.0023097	360	8.92278e-09	71.65
g195525.t1	senescence-associated protein AAF, chlorolplastic-like isoform X1	-7.77157	61.3431	1.59407	-4.87531	1.08638e-06	0.000159816	384	1.20992e-25	86.88
g496682.t1	pathogenesis-related protein 1-like	-7.8983	205.236	1.1047	-7.14975	8.69345e-13	5.70017e-10	633	4.17328e-71	77.47
g4180.t1	RNA-directed DNA polymerase	-7.90911	25.0319	1.83335	-4.31403	1.60303e-05	0.00154571	492	2.21131e-08	69.32
g17358.t1	histone H4	-8.07485	28.1164	1.7108	-4.71993	2.35921e-06	0.000300787	630	6.11111e-52	98.09
g363733.t1	PREDICTED: uncharacterized protein LOC105140353	-8.09769	28.7742	1.65637	-4.88881	1.0145e-06	0.000150204	1566	5.84167e-47	51.06
g538383.t1	protein REDUCED WALL ACETYLATION 3-like	-8.12848	29.3261	1.7287	-4.70208	2.57523e-06	0.000322945	1521	0	80.74
g480411.t1	scopoletin glucosyltransferase-like	-8.17402	251.997	1.83308	-4.45916	8.22808e-06	0.000878262	1377	2.65009e-162	67.26
g320305.t1	G-type lectin S-receptor-like serine/threonine-protein kinase At4g27290	-8.18855	30.7011	1.68373	-4.86334	1.15422e-06	0.000164523	2466	0	64.46
g36464.t1	scopoletin glucosyltransferase-like	-8.20807	30.7835	1.84021	-4.4604	8.18061e-06	0.000877275	573	3.07981e-65	67.63
g484154.t1	DNA-directed RNA polymerases II, IV and V subunit 11-like	-8.25122	31.3831	1.75277	-4.70753	2.50737e-06	0.000316162	363	2.76614e-75	92.35
g458625.t1	glycerol-3-phosphate 2-O-acyltransferase 6-like	-8.34055	34.0859	1.93329	-4.31416	1.60208e-05	0.00154571	1518	0	89.56
g174775.t1	cytochrome b5	-8.34727	184.487	1.11525	-7.48465	7.17365e-14	5.31058e-11	528	1.69057e-77	90.92
g211112.t1	MICOS complex subunit MIC60 isoform X2	-8.55209	39.2974	1.61909	-5.28204	1.2775e-07	2.46365e-05	714	1.27991e-66	88.53
g424831.t1	LRR receptor-like serine/threonine-protein kinase FLS2	-8.64962	42.2847	1.69479	-5.10365	3.33171e-07	5.66366e-05	3408	0	70.86
g89099.t1	two pore potassium channel a isoform X1	-8.65336	42.2852	1.62525	-5.32434	1.01319e-07	2.02188e-05	1143	1.11127e-150	75.95
g38126.t1	hydrogen cyanide synthase subunit HcnC	-9.04082	150.634	1.4752	-6.12853	8.86933e-10	2.86679e-07	1380	0	79.42
g413619.t1	bifunctional riboflavin kinase/FMN phosphatase-like	-9.04521	150.917	1.47428	-6.13533	8.49807e-10	2.84329e-07	1089	5.29612e-129	70.72
g188945.t1	cinnamoyl-CoA reductase 1-like	-9.16323	60.177	1.63134	-5.61701	1.94293e-08	4.6935e-06	978	9.36512e-176	83.69
g250797.t1	protein disulfide isomerase pTAC5, chloroplastic isoform X2	-9.19464	60.8009	1.55362	-5.91822	3.25454e-09	9.10835e-07	465	2.88311e-23	64.75
g405878.t1	cytochrome P450 71A1-like	-9.22771	330.018	1.90237	-4.85064	1.23063e-06	0.000173262	1605	0	73.38
g532312.t1	putative disease resistance protein RGA3 isoform X1	-9.25493	64.0963	1.5526	-5.96092	2.50815e-09	7.286e-07	1410	1.5553e-16	45.27
g396107.t1	methionine adenosyltransferase 2 subunit beta	-9.61108	81.975	1.53436	-6.26391	3.75436e-10	1.41244e-07	1098	4.54521e-159	80.8
g291318.t1	mitochondrial fission 1 protein A	-9.95982	103.589	1.52316	-6.53893	6.19591e-11	2.63315e-08	498	2.04272e-84	91.12

## Sheet: Sheet2
	Sample Name	Biological process	Cellular process	Molecular process	Total
	C1	2388	1132	2876	6396
	C2	2464	2116	2951	7531
	C3	2266	1962	2730	6958
	C4	2207	1918	2658	6783
